# Supplementary material
Source: Royal Society of Chemistry journal article supplement (doi:10.1039/d6qi00530f)

## Supplementary information for

# Well-defined bridged dicopper(III) chloride, azide and amino complexes

Vladimir Motornov<sup>[a],\*</sup> and Niklas Limberg<sup>[a]</sup>

[a] Dr. V. Motornov, N. Limberg, Freie Universität Berlin; Fabeckstraße 34-36, 14195 Berlin, Germany.  
E-mail: [cuprate51@gmail.com](mailto:cuprate51@gmail.com), [motornov@zedat.fu-berlin.de](mailto:motornov@zedat.fu-berlin.de)

### Table of contents

|                                                                                                                                                                                        |    |
|----------------------------------------------------------------------------------------------------------------------------------------------------------------------------------------|----|
| General.....                                                                                                                                                                           | 1  |
| X-ray crystallography (general procedure).....                                                                                                                                         | 2  |
| Synthesis of bis( $\mu_2$ -chlorido)dicopper(III) complex 3 $[\text{Cu}(\text{CF}_3)_2\text{Cl} \cdot \text{H}_2\text{O}]_2$ .....                                                     | 3  |
| Synthesis of bis( $\mu_2$ -( $\kappa_1$ -azido))dicopper(III) complex 4 $[\text{Cu}(\text{CF}_3)_2(\text{N}_3)]_2$ .....                                                               | 6  |
| Synthesis of $\mu_2$ -(dimethylamino)- $\mu_2$ -hydroxy-dicopper(III) complex 5 $[(\text{F}_3\text{C})_2\text{Cu}(\mu_2\text{-OH})(\mu_2\text{-NMe}_2)\text{Cu}(\text{CF}_3)_2]$ ..... | 16 |
| Calculations and oxidation state analysis of complexes.....                                                                                                                            | 20 |
| Transformations and applications of complexes.....                                                                                                                                     | 21 |
| Synthesis of vinyl azides 7 from copper(III) azide 4.....                                                                                                                              | 21 |
| Difluoromethylation of alcohol.....                                                                                                                                                    | 21 |
| Formation of <i>N</i> -trifluoromethylamine 9 via reductive elimination in 5.....                                                                                                      | 22 |
| Control experiment with TEMPO.....                                                                                                                                                     | 22 |
| References.....                                                                                                                                                                        | 23 |
| Copies of NMR spectra.....                                                                                                                                                             | 25 |

### General

All solvents used for the reactions were HPLC grade. All commercially available chemicals were purchased from commercial suppliers (BLD Pharmatech, Sigma-Aldrich) and were used as received. Copper(III) trifluoromethyl hydroxide tetramer **1** was prepared according to known procedure reported by us.<sup>[1]</sup> Yields refer to isolated compounds (unless noted otherwise in the applications part). NMR spectra were recorded on a JEOL 400 MHz spectrometer in the solvent indicated using 5 mm diameter NMR tubes; chemical shifts ( $\delta$ ) are given in ppm relative to the residual solvent peak. The chemical shift values ( $\delta$ ) are reported in ppm relative to TMS (0 ppm for  $^1\text{H}$  and  $^{13}\text{C}$  NMR) and  $\text{CFCl}_3$  (0 ppm for  $^{19}\text{F}$  NMR). IR spectra were recorded on a Nicolet 6700 FTIR (Thermo Fisher Scientific) spectrometer. Elemental analysis for the determination of purity was performed by complexometric titration of copper with EDTA, due to unavailability of elemental analysis service for highly unstable and temperature-sensitive compounds. XPS analysis was carried out using an EnviroESCA

spectrometer (SPECS Surface Nano Analysis GmbH, Berlin, Germany), equipped with a monochromatic Al K $\alpha$  X-ray source (Excitation Energy = 1486.71 eV) and a PHOIBOS 150 analyzer operated in fixed analyzer transmission (FAT) mode. Measurements were performed under ultra-high vacuum ( $p < 10^{-5}$  mbar). Samples were prepared indium foil and measured in normal emission geometry at a source-to-sample angle of 55°. Instrument calibration followed the technical procedure provided by SPECS (calibration was performed according to ISO 15472). High-resolution spectra were recorded at a pass energy of 50 eV. Data fitting was conducted using the UNIFIT 2022 software, with a Shirley background and a Lorentzian-Gaussian (L-G) sum function.

### **X-ray crystallography (general procedure)**

A crystal was mounted on a MiTeGen micromount with perfluoroether oil. Data were collected from a shock-cooled single crystal at 150.00 K on a Bruker D8 VENTURE dual wavelength Mo/Cu three-circle diffractometer with a microfocus sealed X-ray tube using a mirror optics as monochromator and a Bruker PHOTON II detector. The diffractometer was equipped with an Oxford Cryostream 700 low temperature device and used MoK $\alpha$  radiation ( $\lambda = 0.71073$  Å). All data were integrated with SAINT V8.41 and a multi-scan absorption correction using SADABS 2016/2 was applied.<sup>[2,3]</sup> The structure was solved by direct methods with SHELXT 2018/2 and refined by full-matrix least-squares methods against  $F^2$  using XL.<sup>[4,5]</sup> All non-hydrogen atoms were refined with anisotropic displacement parameters. All hydrogen atoms were refined isotropic on calculated positions using a riding model with their  $U_{iso}$  values constrained to 1.5 times the  $U_{eq}$  of their pivot atoms for terminal sp<sup>3</sup> carbon atoms and 1.2 times for all other carbon atoms. Crystallographic data for the structures reported in this paper have been deposited with the Cambridge Crystallographic Data Centre.<sup>[6]</sup> CCDC 2533527 (**3**), 2551392 (**4**), 2539161 (**4** · **0.5C<sub>3</sub>H<sub>6</sub>O**), and 2533528 (**5**), contain the supplementary crystallographic data for this paper. These data can be obtained free of charge from The Cambridge Crystallographic Data Centre via [www.ccdc.cam.ac.uk/structures](http://www.ccdc.cam.ac.uk/structures). The CIF files were generated using FinalCif.<sup>[7]</sup>

### Synthesis of bis( $\mu_2$ -chlorido)dicopper(III) complex **3** [ $\text{Cu}(\text{CF}_3)_2\text{Cl} \cdot \text{H}_2\text{O}$ ]<sub>2</sub>

In a 10 ml round-bottomed Schlenk flask under argon atmosphere to the solid heterocubane **1** (21.8 mg, 0.025 mmol [0.1 mmol monomer]) dry dichloromethane (1 ml) was added and the mixture was cooled to  $-40^\circ\text{C}$ . Trimethylsilyl chloride (25  $\mu\text{l}$ , 0.2 mmol, 2 equiv.) was added with vigorous stirring. The mixture was stirred at  $-40^\circ\text{C}$  for 1 hour; during this time the solution turned intensive yellow. It was concentrated to ca. 0.2 ml volume under vacuum, then layered with pentane (ca. 2 ml) containing 0.5% of acetone. Crystallization at  $-40^\circ\text{C}$  for 2 days afforded yellow crystals of **bis( $\mu_2$ -chlorido)-diaqua-tetrakis(trifluoromethyl)dicopper(III) 3** with a composition [ $\text{Cu}(\text{CF}_3)_2\text{Cl} \cdot \text{H}_2\text{O}$ ]<sub>2</sub> (11 mg, 43%), which were dried by a stream of argon at  $-40^\circ\text{C}$  to  $-20^\circ\text{C}$  (solvents including outer-sphere acetone are removed at this step) and collected.  $^{19}\text{F}$  NMR (376 MHz,  $\text{CD}_3\text{CN}$ , 293 K)  $\delta$   $-23.3$  (br s, 6F);  $^{19}\text{F}$  NMR ( $\text{CD}_2\text{Cl}_2$ , 376 MHz, 213 K)  $\delta$   $-20.1$  (br s, 6F);  $^{13}\text{C}\{^{19}\text{F}\}$  NMR ( $\text{CD}_2\text{Cl}_2$ , 101 MHz, 213 K)  $\delta$  121.2 (br) and 117.4 (br) [apparent d,  $J_{\text{C, Cu}}$ ]; IR (ATR):  $\tilde{\nu}$  = 3331, 1438, 1156, 1066, 1028, 727  $\text{cm}^{-1}$ ; Elem. Anal. calcd. for  $\text{C}_4\text{H}_4\text{F}_{12}\text{Cu}_2\text{Cl}_2\text{O}_2$ : 33.80% Cu, found: 33.37% Cu. CCDC 2533527.

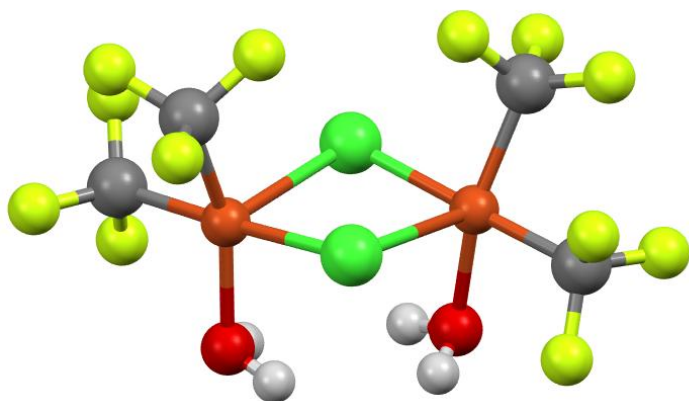

Figure S1. Crystal structure of bis( $\mu_2$ -chlorido)dicopper(III) complex **3**

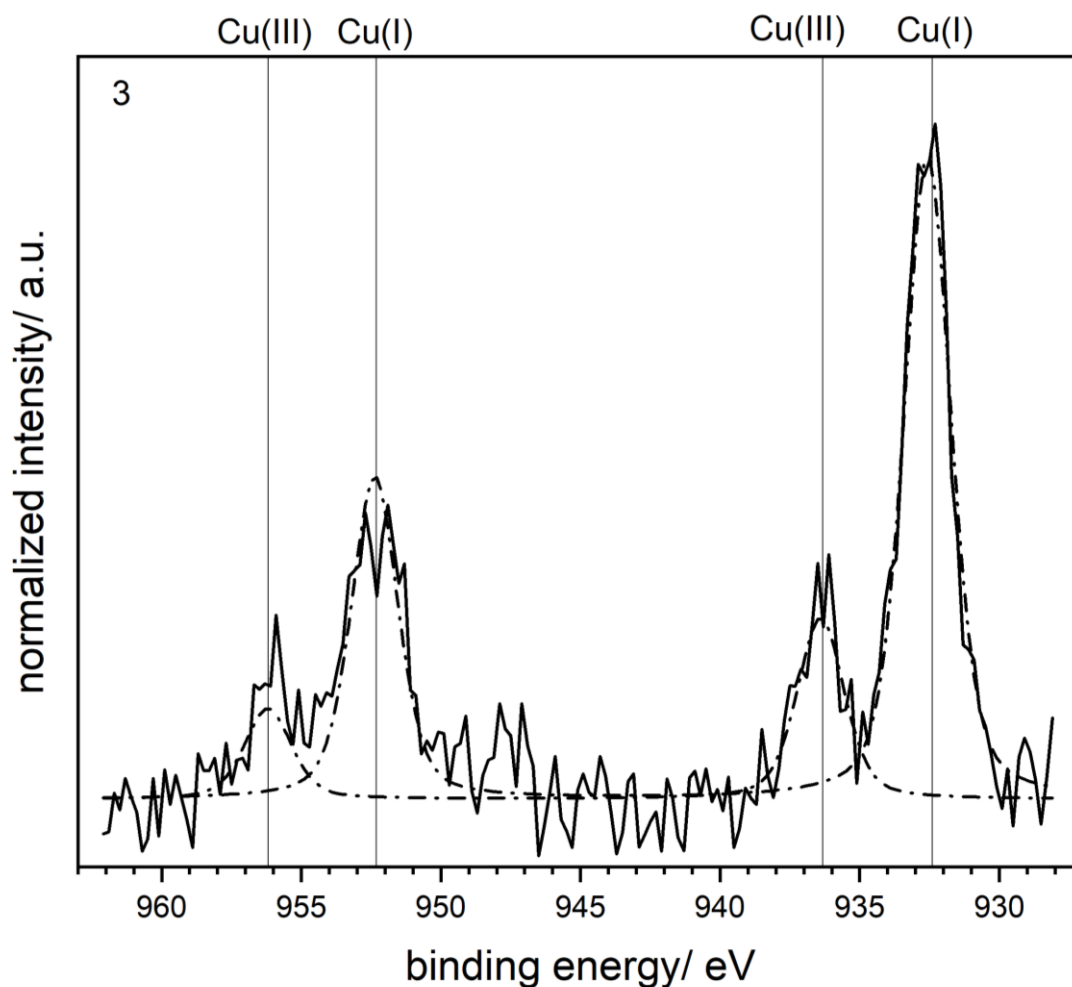

Figure S2. Highly resolved Cu2p XPS spectrum of the chlorido complex **3** at room temperature (and its Cu(I) decomposition product)

Table 1. Crystal data and structure refinement for **3**

|                                           |                                                                                     |
|-------------------------------------------|-------------------------------------------------------------------------------------|
| CCDC number                               | 2533527                                                                             |
| Empirical formula                         | C <sub>2</sub> H <sub>2</sub> ClCuF <sub>6</sub> O(C <sub>3</sub> H <sub>6</sub> O) |
| Formula weight                            | 313.10                                                                              |
| Temperature [K]                           | 150.00                                                                              |
| Crystal system                            | monoclinic                                                                          |
| Space group (number)                      | C2/c (15)                                                                           |
| <i>a</i> [Å]                              | 17.265(2)                                                                           |
| <i>b</i> [Å]                              | 8.0608(9)                                                                           |
| <i>c</i> [Å]                              | 15.617(2)                                                                           |
| $\alpha$ [°]                              | 90                                                                                  |
| $\beta$ [°]                               | 101.271(5)                                                                          |
| $\gamma$ [°]                              | 90                                                                                  |
| Volume [Å <sup>3</sup> ]                  | 2131.5(5)                                                                           |
| <i>Z</i>                                  | 8                                                                                   |
| $\rho_{\text{calc}}$ [gcm <sup>-3</sup> ] | 1.951                                                                               |
| $\mu$ [mm <sup>-1</sup> ]                 | 2.362                                                                               |
| <i>F</i> (000)                            | 1232                                                                                |
| Crystal size [mm <sup>3</sup> ]           | 0.08×0.151×0.396                                                                    |
| Crystal colour                            | yellow                                                                              |
| Crystal shape                             | needle                                                                              |
| Radiation                                 | MoK $\alpha$ ( $\lambda=0.71073$ Å)                                                 |
| 2 $\theta$ range [°]                      | 4.81 to 50.78 (0.83 Å)                                                              |

|                                                              |                                                                                |
|--------------------------------------------------------------|--------------------------------------------------------------------------------|
| Index ranges                                                 | -20 ≤ <i>h</i> ≤ 20<br>-9 ≤ <i>k</i> ≤ 9<br>-18 ≤ <i>l</i> ≤ 18                |
| Reflections collected                                        | 27779                                                                          |
| Independent reflections                                      | 1968<br><i>R</i> <sub>int</sub> = 0.0772<br><i>R</i> <sub>sigma</sub> = 0.0308 |
| Completeness to $\theta = 25.242^\circ$                      | 100.0 %                                                                        |
| Data / Restraints / Parameters                               | 1968 / 0 / 139                                                                 |
| Absorption correction                                        | 0.5229 / 0.7452                                                                |
| <i>T</i> <sub>min</sub> / <i>T</i> <sub>max</sub> (method)   | (multi-scan)                                                                   |
| Goodness-of-fit on <i>F</i> <sup>2</sup>                     | 1.186                                                                          |
| Final <i>R</i> indexes [ <i>I</i> ≥ 2 $\sigma$ ( <i>I</i> )] | <i>R</i> <sub>1</sub> = 0.0298<br><i>wR</i> <sub>2</sub> = 0.0652              |
| Final <i>R</i> indexes [all data]                            | <i>R</i> <sub>1</sub> = 0.0447<br><i>wR</i> <sub>2</sub> = 0.0781              |

Table 2. Bond lengths and angles for **3**

| Atom–Atom                 | Length [Å] |
|---------------------------|------------|
| Cu1–Cl1                   | 2.2181(9)  |
| Cu1–Cl1 <sup>#1</sup>     | 2.7571(9)  |
| Cu1–O1                    | 1.946(2)   |
| Cu1–C2                    | 1.949(3)   |
| Cu1–C1                    | 1.960(4)   |
| F5–C2                     | 1.337(4)   |
| F4–C2                     | 1.328(4)   |
| F6–C2                     | 1.344(4)   |
| F2–C1                     | 1.327(4)   |
| O1–H1A                    | 0.8710     |
| O1–H1B                    | 0.8711     |
| F3–C1                     | 1.325(4)   |
| F1–C1                     | 1.323(4)   |
| O2–C3                     | 1.224(4)   |
| C3–C5                     | 1.480(5)   |
| C3–C4                     | 1.481(5)   |
| C5–H5A                    | 0.9800     |
| C5–H5B                    | 0.9800     |
| C5–H5C                    | 0.9800     |
| C4–H4A                    | 0.9800     |
| C4–H4B                    | 0.9800     |
| C4–H4C                    | 0.9800     |
|                           |            |
| Atom–Atom–Atom            | Angle [°]  |
| Cl1–Cu1–Cl1 <sup>#1</sup> | 87.32(3)   |
| O1–Cu1–Cl1                | 92.01(7)   |
| O1–Cu1–Cl1 <sup>#1</sup>  | 94.63(7)   |
| O1–Cu1–C2                 | 90.07(13)  |
| O1–Cu1–C1                 | 159.52(13) |
| C2–Cu1–Cl1 <sup>#1</sup>  | 91.08(10)  |
| C2–Cu1–Cl1                | 177.47(11) |
| C2–Cu1–C1                 | 87.60(15)  |
| C1–Cu1–Cl1 <sup>#1</sup>  | 105.75(12) |
| C1–Cu1–Cl1                | 90.94(11)  |
| Cu1–Cl1–Cu1 <sup>#1</sup> | 91.37(3)   |
| Cu1–O1–H1A                | 109.3      |
| Cu1–O1–H1B                | 109.5      |
| H1A–O1–H1B                | 104.4      |
| O2–C3–C5                  | 121.1(3)   |
| O2–C3–C4                  | 121.3(4)   |
| C5–C3–C4                  | 117.6(3)   |
| F5–C2–Cu1                 | 112.2(2)   |
| F5–C2–F6                  | 106.5(3)   |
| F4–C2–Cu1                 | 116.5(2)   |
| F4–C2–F5                  | 108.1(3)   |
| F4–C2–F6                  | 105.3(3)   |
| F6–C2–Cu1                 | 107.6(2)   |
| F2–C1–Cu1                 | 105.4(2)   |
| F3–C1–Cu1                 | 119.7(3)   |
| F3–C1–F2                  | 106.0(3)   |
| F1–C1–Cu1                 | 109.2(2)   |
| F1–C1–F2                  | 109.2(3)   |
| F1–C1–F3                  | 107.0(3)   |
| C3–C5–H5A                 | 109.5      |
| C3–C5–H5B                 | 109.5      |

|            |       |
|------------|-------|
| C3–C5–H5C  | 109.5 |
| H5A–C5–H5B | 109.5 |
| H5A–C5–H5C | 109.5 |
| H5B–C5–H5C | 109.5 |
| C3–C4–H4A  | 109.5 |
| C3–C4–H4B  | 109.5 |
| C3–C4–H4C  | 109.5 |
| H4A–C4–H4B | 109.5 |
| H4A–C4–H4C | 109.5 |
| H4B–C4–H4C | 109.5 |

## Synthesis of bis( $\mu_2$ -( $\kappa_1$ -azido))dicopper(III) complex **4** $[\text{Cu}(\text{CF}_3)_2(\text{N}_3)]_2$

In a 10 ml round-bottomed Schlenk flask under argon atmosphere, to the heterocubane **1** (21.8 mg, 0.025 mmol [0.1 mmol monomer]) dry dichloromethane (0.5 ml) was added and the mixture was cooled to  $-40^\circ\text{C}$ .  $\text{TMSN}_3$  (26.3  $\mu\text{l}$ , 0.2 mmol, 2 equiv.) was added with vigorous stirring. The mixture was additionally stirred for 1 hour at  $-40^\circ\text{C}$ , then connected to high vacuum and evaporated to dryness (several hours at room temperature) to completely remove silanol by-products to furnish the complex **4** as a bright yellow solid (yield 23.5 mg, 96%). Single crystal for X-ray crystallography was grown from 1:1 pentane/DCM [optionally with an addition of 0.5% of acetone for better quality crystals] at  $-20^\circ\text{C}$ .  $^{19}\text{F}$  NMR ( $\text{CDCl}_3$ , 376 MHz, 293 K)  $\delta$   $-27.5$  (s, 6F);  $^{13}\text{C}\{^{19}\text{F}\}$  NMR ( $\text{CDCl}_3$ , 101 MHz, 293 K)  $\delta$  121.4 (br) and 117.7 (br) [apparent d,  $J_{\text{C,Cu}}$ ]; IR (ATR) (for non-solvated **4**):  $\tilde{\nu} = 2117, 1298, 1143, 1086, 926, 717$   $\text{cm}^{-1}$ ; IR (ATR) (for the crystals of acetone solvate  $\mathbf{4} \cdot 0.5\text{C}_3\text{H}_6\text{O}$ ):  $\tilde{\nu} = 2114, 1659, 1295, 1148, 1080, 923, 738, 712, 576$   $\text{cm}^{-1}$ ; Elem. Anal. calcd. for  $\text{C}_4\text{F}_{12}\text{Cu}_2\text{N}_6$ : 26.09% Cu, found: 25.88% Cu; CCDC 2551392 (non-solvated **4**), 2539161 (acetone solvate  $[\text{Cu}(\text{CF}_3)_2(\mu_2\text{-N}_3)_2\text{Cu}(\text{CF}_3)_2 \cdot 0.5\text{C}_3\text{H}_6\text{O}]_n$ ).

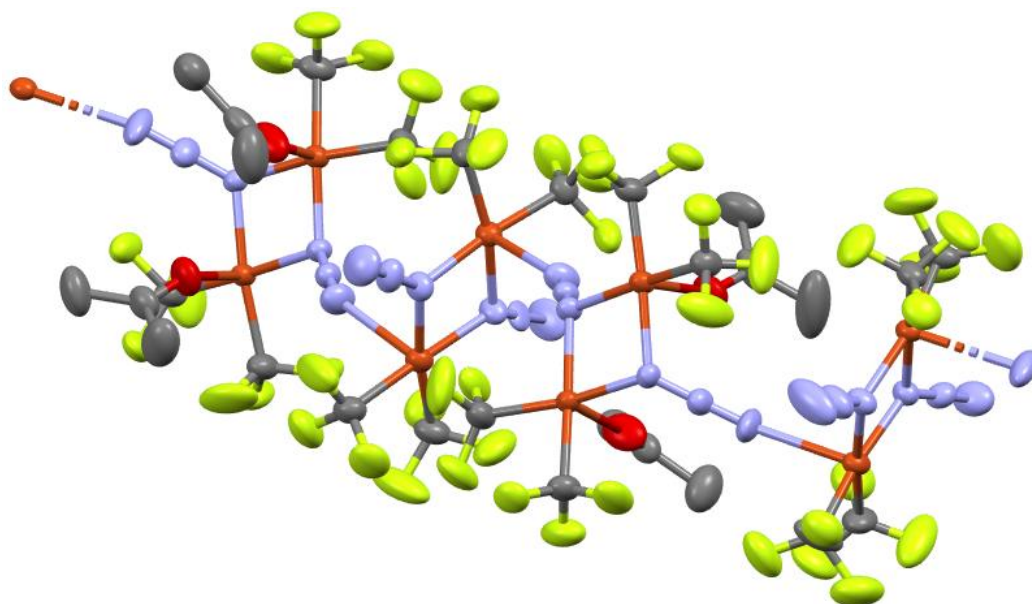

Figure S3. Polymeric structure of azido complex **4**  $[\text{Cu}(\text{CF}_3)_2(\mu_2\text{-N}_3)_2\text{Cu}(\text{CF}_3)_2 \cdot 0.5\text{C}_3\text{H}_6\text{O}]_n$

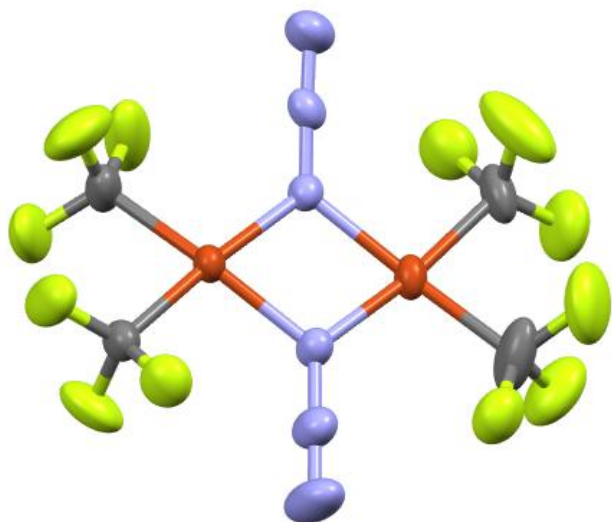

Figure S4. Dimer of the non-solvated azido complex **4**

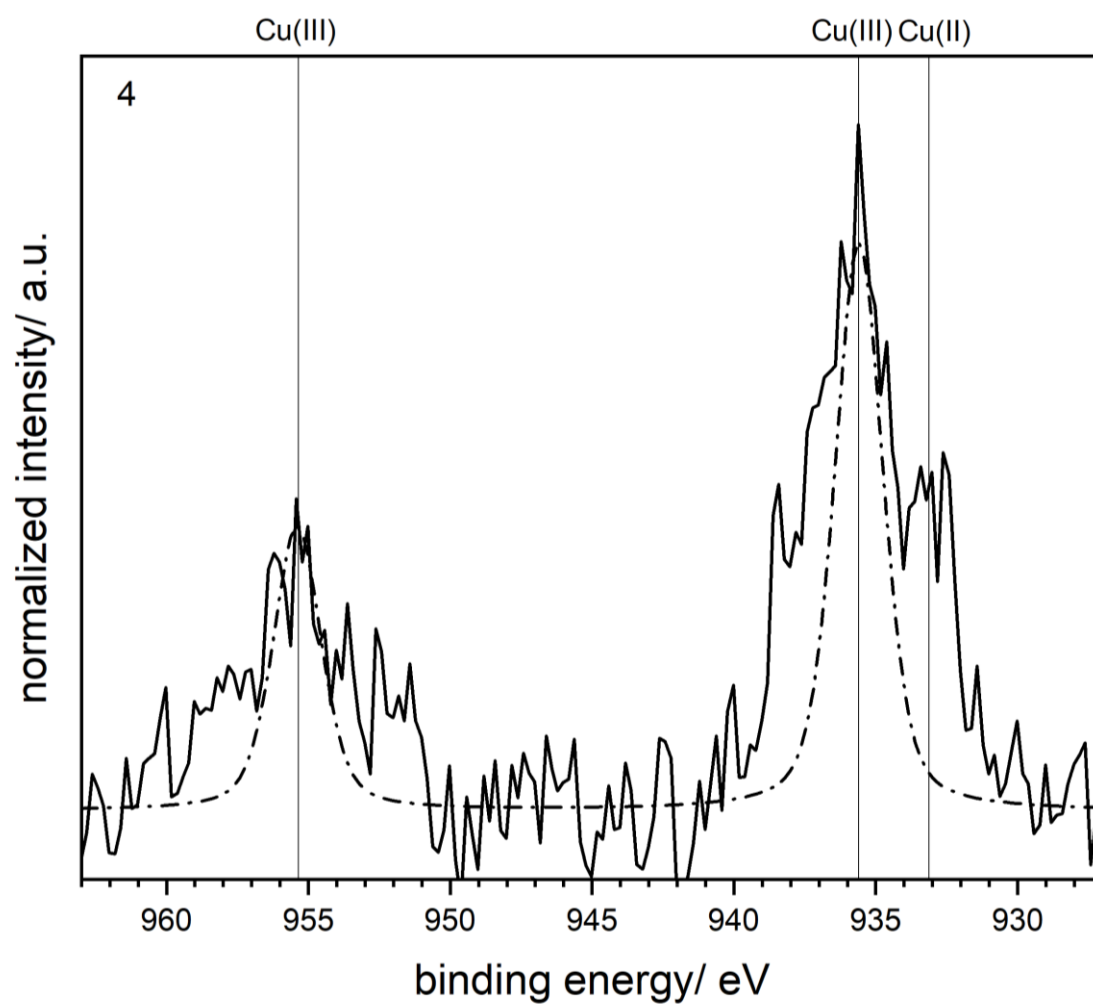

Figure S5. Highly resolved Cu<sub>2</sub>p XPS spectrum of the azido complex **4**

Table 3. Crystal data and structure refinement for **4**

|                                           |                                                               |
|-------------------------------------------|---------------------------------------------------------------|
| CCDC number                               | 2551392                                                       |
| Empirical formula                         | C <sub>4</sub> Cu <sub>2</sub> F <sub>12</sub> N <sub>6</sub> |
| Formula weight                            | 487.18                                                        |
| Temperature [K]                           | 150.00                                                        |
| Crystal system                            | triclinic                                                     |
| Space group (number)                      | $P\bar{1}$ (2)                                                |
| <i>a</i> [Å]                              | 7.19(2)                                                       |
| <i>b</i> [Å]                              | 9.098(19)                                                     |
| <i>c</i> [Å]                              | 10.11(3)                                                      |
| $\alpha$ [°]                              | 88.96(9)                                                      |
| $\beta$ [°]                               | 70.42(12)                                                     |
| $\gamma$ [°]                              | 87.96(11)                                                     |
| Volume [Å <sup>3</sup> ]                  | 623(3)                                                        |
| <i>Z</i>                                  | 2                                                             |
| $\rho_{\text{calc}}$ [gcm <sup>-3</sup> ] | 2.597                                                         |
| $\mu$ [mm <sup>-1</sup> ]                 | 3.577                                                         |
| <i>F</i> (000)                            | 464                                                           |
| Crystal size [mm <sup>3</sup> ]           | 0.04×0.069×0.093                                              |
| Crystal colour                            | yellow                                                        |
| Crystal shape                             | plate                                                         |
| Radiation                                 | MoK $\alpha$ ( $\lambda=0.71073$ Å)                           |

|                                                                                     |                                                                                |
|-------------------------------------------------------------------------------------|--------------------------------------------------------------------------------|
| 2 $\theta$ range [°]                                                                | 4.28 to 51.19 (0.82 Å)                                                         |
| Index ranges                                                                        | -8 ≤ <i>h</i> ≤ 8<br>-10 ≤ <i>k</i> ≤ 10<br>0 ≤ <i>l</i> ≤ 12                  |
| Reflections collected                                                               | 2301                                                                           |
| Independent reflections                                                             | 2301<br><i>R</i> <sub>int</sub> = 0.1419<br><i>R</i> <sub>sigma</sub> = 0.0965 |
| Completeness to<br>$\theta = 25.242^\circ$                                          | 99.4 %                                                                         |
| Data / Restraints /<br>Parameters                                                   | 2301 / 30 / 218                                                                |
| Absorption correction<br><i>T</i> <sub>min</sub> / <i>T</i> <sub>max</sub> (method) | 0.4707 / 0.7452<br>(multi-scan)                                                |
| Goodness-of-fit on <i>F</i> <sup>2</sup>                                            | 1.063                                                                          |
| Final <i>R</i> indexes<br>[ <i>I</i> ≥ 2σ( <i>I</i> )]                              | <i>R</i> <sub>1</sub> = 0.0952<br><i>wR</i> <sub>2</sub> = 0.2119              |
| Final <i>R</i> indexes<br>[all data]                                                | <i>R</i> <sub>1</sub> = 0.1514<br><i>wR</i> <sub>2</sub> = 0.2571              |
| Largest peak/hole [eÅ <sup>-3</sup> ]                                               | 2.58/-1.43                                                                     |

Table 4. Bond lengths and angles for **4**

| Atom–Atom                               | Length [Å] |  |  |
|-----------------------------------------|------------|--|--|
| Cu1–Cu1 <sup>#1</sup>                   | 3.019(10)  |  |  |
| Cu1–N1                                  | 1.953(15)  |  |  |
| Cu1–N1 <sup>#1</sup>                    | 1.950(18)  |  |  |
| Cu1–C1                                  | 1.92(2)    |  |  |
| Cu1–C2                                  | 1.95(2)    |  |  |
| Cu2–Cu2 <sup>#2</sup>                   | 3.031(11)  |  |  |
| Cu2–N4                                  | 1.958(16)  |  |  |
| Cu2–N4 <sup>#2</sup>                    | 1.922(15)  |  |  |
| Cu2–C4                                  | 1.93(2)    |  |  |
| Cu2–C3                                  | 1.95(2)    |  |  |
| F6–C2                                   | 1.31(3)    |  |  |
| F12–C4                                  | 1.39(2)    |  |  |
| N1–N2                                   | 1.21(2)    |  |  |
| F10–C4                                  | 1.31(3)    |  |  |
| F3–C1                                   | 1.29(2)    |  |  |
| N4–N5                                   | 1.23(2)    |  |  |
| F9–C3                                   | 1.28(3)    |  |  |
| F7–C3                                   | 1.26(3)    |  |  |
| N2–N3                                   | 1.12(2)    |  |  |
| F11–C4                                  | 1.29(2)    |  |  |
| C1–F2                                   | 1.37(3)    |  |  |
| C1–F1                                   | 1.27(3)    |  |  |
| C2–F4                                   | 1.28(2)    |  |  |
| C2–F5                                   | 1.34(3)    |  |  |
| F8–C3                                   | 1.33(3)    |  |  |
| N5–N6                                   | 1.10(2)    |  |  |
|                                         |            |  |  |
| Atom–Atom–Atom                          | Angle [°]  |  |  |
| N1–Cu1–Cu1 <sup>#1</sup>                | 39.3(5)    |  |  |
| N1 <sup>#1</sup> –Cu1–Cu1 <sup>#1</sup> | 39.4(5)    |  |  |
| N1 <sup>#1</sup> –Cu1–N1                | 78.7(7)    |  |  |
| N1 <sup>#1</sup> –Cu1–C2                | 174.6(8)   |  |  |
| N1–Cu1–C2                               | 96.9(9)    |  |  |
| C1–Cu1–Cu1 <sup>#1</sup>                | 137.0(7)   |  |  |
| C1–Cu1–N1 <sup>#1</sup>                 | 98.1(8)    |  |  |
| C1–Cu1–N1                               | 172.3(8)   |  |  |
| C1–Cu1–C2                               | 86.8(10)   |  |  |
| C2–Cu1–Cu1 <sup>#1</sup>                | 136.1(7)   |  |  |
| N4–Cu2–Cu2 <sup>#2</sup>                | 38.2(5)    |  |  |
| N4 <sup>#2</sup> –Cu2–Cu2 <sup>#2</sup> | 39.1(5)    |  |  |
|                                         |            |  |  |
| N4 <sup>#2</sup> –Cu2–N4                | 77.3(8)    |  |  |
| N4 <sup>#2</sup> –Cu2–C4                | 175.7(8)   |  |  |
| N4 <sup>#2</sup> –Cu2–C3                | 99.8(9)    |  |  |
| C4–Cu2–Cu2 <sup>#2</sup>                | 136.8(7)   |  |  |
| C4–Cu2–N4                               | 98.6(8)    |  |  |
| C4–Cu2–C3                               | 84.4(10)   |  |  |
| C3–Cu2–Cu2 <sup>#2</sup>                | 138.4(7)   |  |  |
| C3–Cu2–N4                               | 172.2(8)   |  |  |
| Cu1 <sup>#1</sup> –N1–Cu1               | 101.3(7)   |  |  |
| N2–N1–Cu1                               | 127.3(14)  |  |  |
| N2–N1–Cu1 <sup>#1</sup>                 | 125.8(13)  |  |  |
| Cu2 <sup>#2</sup> –N4–Cu2               | 102.7(8)   |  |  |
| N5–N4–Cu2                               | 125.3(14)  |  |  |
| N5–N4–Cu2 <sup>#2</sup>                 | 131.6(14)  |  |  |
| N3–N2–N1                                | 179(2)     |  |  |
| F3–C1–Cu1                               | 116.2(14)  |  |  |
| F3–C1–F2                                | 103.0(16)  |  |  |
| F2–C1–Cu1                               | 107.3(14)  |  |  |
| F1–C1–Cu1                               | 112.5(15)  |  |  |
| F1–C1–F3                                | 109.4(19)  |  |  |
| F1–C1–F2                                | 107.7(19)  |  |  |
| F6–C2–Cu1                               | 105.9(14)  |  |  |
| F6–C2–F5                                | 107(2)     |  |  |
| F4–C2–Cu1                               | 119.9(18)  |  |  |
| F4–C2–F6                                | 107.9(18)  |  |  |
| F4–C2–F5                                | 110(2)     |  |  |
| F5–C2–Cu1                               | 105.7(14)  |  |  |
| N6–N5–N4                                | 179(2)     |  |  |
| F12–C4–Cu2                              | 105.3(13)  |  |  |
| F10–C4–Cu2                              | 121.0(15)  |  |  |
| F10–C4–F12                              | 101.9(16)  |  |  |
| F11–C4–Cu2                              | 111.9(14)  |  |  |
| F11–C4–F12                              | 105.3(16)  |  |  |
| F11–C4–F10                              | 109.6(18)  |  |  |
| F9–C3–Cu2                               | 115.2(17)  |  |  |
| F9–C3–F8                                | 103.6(19)  |  |  |
| F7–C3–Cu2                               | 113.3(15)  |  |  |
| F7–C3–F9                                | 110(2)     |  |  |
| F7–C3–F8                                | 109(2)     |  |  |
| F8–C3–Cu2                               | 104.8(15)  |  |  |

Symmetry transformations used to generate equivalent atoms:

#1: 1-X, 1-Y, 1-Z; #2: -X, -Y, 1-Z;

Table 5. Crystal data and structure refinement for **4 · 0.5C<sub>3</sub>H<sub>6</sub>O**

|                      |                                                                                                |
|----------------------|------------------------------------------------------------------------------------------------|
| CCDC number          | 2539161                                                                                        |
| Empirical formula    | C <sub>28</sub> H <sub>24</sub> Cu <sub>8</sub> F <sub>48</sub> N <sub>24</sub> O <sub>4</sub> |
| Formula weight       | 2181.03                                                                                        |
| Temperature [K]      | 150.00                                                                                         |
| Crystal system       | triclinic                                                                                      |
| Space group (number) | <i>P</i> $\bar{1}$ (2)                                                                         |
| <i>a</i> [Å]         | 11.5078(19)                                                                                    |
| <i>b</i> [Å]         | 14.270(3)                                                                                      |
| <i>c</i> [Å]         | 22.213(4)                                                                                      |
| $\alpha$ [°]         | 96.426(4)                                                                                      |
| $\beta$ [°]          | 102.977(7)                                                                                     |
| $\gamma$ [°]         | 103.826(5)                                                                                     |

|                                                                   |                                                                            |
|-------------------------------------------------------------------|----------------------------------------------------------------------------|
| Volume [ $\text{\AA}^3$ ]                                         | 3398.4(10)                                                                 |
| Z                                                                 | 2                                                                          |
| $\rho_{\text{calc}}$ [ $\text{gcm}^{-3}$ ]                        | 2.131                                                                      |
| $\mu$ [ $\text{mm}^{-1}$ ]                                        | 2.639                                                                      |
| $F(000)$                                                          | 2112                                                                       |
| Crystal size [ $\text{mm}^3$ ]                                    | 0.176×0.289×0.402                                                          |
| Crystal colour                                                    | yellow                                                                     |
| Crystal shape                                                     | plate                                                                      |
| Radiation                                                         | MoK $_{\alpha}$ ( $\lambda=0.71073$ $\text{\AA}$ )                         |
| 2 $\theta$ range [ $^{\circ}$ ]                                   | 3.82 to 50.71 (0.83 $\text{\AA}$ )                                         |
| Index ranges                                                      | -13 $\leq$ h $\leq$ 13<br>-17 $\leq$ k $\leq$ 17<br>-26 $\leq$ l $\leq$ 26 |
| Reflections collected                                             | 81671                                                                      |
| Independent reflections                                           | 12416<br>$R_{\text{int}} = 0.0706$<br>$R_{\text{sigma}} = 0.0412$          |
| Completeness to<br>$\theta = 25.242^{\circ}$                      | 99.9 %                                                                     |
| Data / Restraints /<br>Parameters                                 | 12416 / 417 / 1204                                                         |
| Absorption correction<br>$T_{\text{min}}/T_{\text{max}}$ (method) | 0.4717 / 0.7452<br>(multi-scan)                                            |
| Goodness-of-fit on $F^2$                                          | 1.092                                                                      |
| Final R indexes<br>[ $I \geq 2\sigma(I)$ ]                        | $R_1 = 0.0500$<br>$wR_2 = 0.1220$                                          |
| Final R indexes<br>[all data]                                     | $R_1 = 0.0732$<br>$wR_2 = 0.1482$                                          |
| Largest peak/hole [ $\text{e}\text{\AA}^{-3}$ ]                   | 2.21/-0.72                                                                 |

Table 6. Bond lengths and angles for  $4 \cdot 0.5\text{C}_3\text{H}_6\text{O}$ 

| Atom–Atom | Length [Å] | Atom–Atom | Length [Å] |
|-----------|------------|-----------|------------|
| Cu3–Cu4   | 2.9844(10) | N8–N9     | 1.134(7)   |
| Cu3–N10   | 1.968(4)   | N22–N23   | 1.219(6)   |
| Cu3–N7    | 1.977(4)   | F9–C3     | 1.319(7)   |
| Cu3–O1    | 2.281(5)   | F8–C3     | 1.305(7)   |
| Cu3–C5    | 1.949(6)   | F5–C2     | 1.307(9)   |
| Cu3–C6    | 1.945(7)   | O3–C23    | 1.225(8)   |
| Cu7–Cu8   | 3.0038(10) | N11–N12   | 1.133(7)   |
| Cu7–N22   | 1.972(4)   | F6–C2     | 1.287(10)  |
| Cu7–O3    | 2.389(5)   | N23–N24   | 1.142(7)   |
| Cu7–N19   | 1.970(4)   | N2–N1     | 1.220(7)   |
| Cu7–C20   | 1.944(6)   | N2–N3     | 1.127(7)   |
| Cu7–C19   | 1.934(7)   | F30–C16   | 1.325(8)   |
| Cu4–N10   | 1.961(4)   | N19–N20   | 1.221(7)   |
| Cu4–N7    | 1.965(4)   | O2–C12    | 1.218(8)   |
| Cu4–O2    | 2.361(5)   | F25–C15   | 1.341(9)   |
| Cu4–C7    | 1.939(6)   | F11–C4    | 1.312(8)   |
| Cu4–C8    | 1.950(6)   | F2–C1     | 1.263(8)   |
| Cu8–N22   | 1.959(4)   | N4–N5     | 1.233(7)   |
| Cu8–N19   | 1.967(4)   | F39A–C19  | 1.330(8)   |
| Cu8–O4    | 2.278(5)   | O1–C9     | 1.204(7)   |
| Cu8–C22   | 1.945(6)   | F41A–C20  | 1.321(8)   |
| Cu8–C21   | 1.946(6)   | F1–C1     | 1.386(9)   |
| Cu6–Cu5   | 3.0251(10) | F14A–C5   | 1.322(10)  |
| Cu6–N13   | 1.950(5)   | N20–N21   | 1.134(8)   |
| Cu6–C18   | 1.937(6)   | N13–N14   | 1.221(7)   |
| Cu6–C17   | 1.935(6)   | F17A–C6   | 1.328(8)   |
| Cu6–N16   | 1.951(5)   | F15A–C5   | 1.338(9)   |
| Cu2–Cu1   | 3.0333(10) | F10–C4    | 1.318(9)   |
| Cu2–N1    | 1.941(5)   | F38A–C19  | 1.353(8)   |
| Cu2–N4    | 1.956(5)   | F12–C4    | 1.312(8)   |
| Cu2–C3    | 1.935(6)   | N14–N15   | 1.127(7)   |
| Cu2–C4    | 1.951(7)   | F23–C8    | 1.318(8)   |
| Cu5–N13   | 1.956(5)   | F48A–C22  | 1.286(10)  |
| Cu5–C15   | 1.943(6)   | F3–C1     | 1.274(9)   |
| Cu5–C16   | 1.933(7)   | F24–C8    | 1.331(8)   |
| Cu5–N16   | 1.955(5)   | F28–C16   | 1.313(8)   |
| Cu1–N1    | 1.958(5)   | F16A–C6   | 1.305(9)   |
| Cu1–N4    | 1.952(5)   | O4–C26    | 1.178(9)   |
| Cu1–C1    | 1.959(7)   | F43A–C21  | 1.316(10)  |
| Cu1–C2    | 1.923(8)   | N5–N6     | 1.118(8)   |
| F20–C7    | 1.328(7)   | F40A–C20  | 1.338(8)   |
| F22–C8    | 1.310(7)   | C15–F27   | 1.300(8)   |
| F36–C18   | 1.315(7)   | F4–C2     | 1.423(11)  |
| F21–C7    | 1.329(8)   | N17B–N18B | 1.134(16)  |
| F19–C7    | 1.337(7)   | N17B–N16  | 1.27(2)    |
| F26–C15   | 1.322(8)   | C22–F47A  | 1.396(10)  |
| F33–C17   | 1.339(7)   | C22–F46A  | 1.269(9)   |
| F35–C18   | 1.353(7)   | C22–F46B  | 1.227(13)  |
| F7–C3     | 1.336(7)   | C22–F47B  | 1.335(15)  |
| F32–C17   | 1.314(8)   | C22–F48B  | 1.381(13)  |
| F29–C16   | 1.306(7)   | F13A–C5   | 1.308(9)   |
| N10–N11   | 1.209(6)   | F45A–C21  | 1.356(9)   |
| F34–C18   | 1.325(7)   | C9–C11    | 1.482(9)   |
| F31–C17   | 1.324(8)   | C9–C10    | 1.478(10)  |
| N8–N7     | 1.227(6)   | F42A–C20  | 1.282(9)   |
|           |            | C20–F42B  | 1.372(15)  |

|                       |                  |
|-----------------------|------------------|
| C20-F41B              | 1.278(18)        |
| C20-F40B              | 1.308(19)        |
| C5-F15B               | 1.296(15)        |
| C5-F14B               | 1.302(15)        |
| C5-F13B               | 1.360(13)        |
| C21-F44A              | 1.270(10)        |
| C21-F44B              | 1.264(14)        |
| C21-F45B              | 1.308(16)        |
| C21-F43B              | 1.383(14)        |
| C11-H11A              | 0.9800           |
| C11-H11B              | 0.9800           |
| C11-H11C              | 0.9800           |
| F37A-C19              | 1.284(9)         |
| C26-C28               | 1.526(12)        |
| C26-C27               | 1.473(13)        |
| C6-F18A               | 1.329(10)        |
| C6-F18B               | 1.331(15)        |
| C6-F16B               | 1.337(16)        |
| C6-F17B               | 1.281(16)        |
| C19-F37B              | 1.301(16)        |
| C19-F38B              | 1.34(2)          |
| C19-F39B              | 1.319(19)        |
| C23-C25               | 1.483(10)        |
| C23-C24               | 1.460(11)        |
| C12-C14               | 1.486(11)        |
| C12-C13               | 1.473(13)        |
| C28-H28A              | 0.9800           |
| C28-H28B              | 0.9800           |
| C28-H28C              | 0.9800           |
| C25-H25A              | 0.9800           |
| C25-H25B              | 0.9800           |
| C25-H25C              | 0.9800           |
| C14-H14A              | 0.9800           |
| C14-H14B              | 0.9800           |
| C14-H14C              | 0.9800           |
| C24-H24A              | 0.9800           |
| C24-H24B              | 0.9800           |
| C24-H24C              | 0.9800           |
| C10-H10A              | 0.9800           |
| C10-H10B              | 0.9800           |
| C10-H10C              | 0.9800           |
| C27-H27A              | 0.9800           |
| C27-H27B              | 0.9800           |
| C27-H27C              | 0.9800           |
| C13-H13A              | 0.9800           |
| C13-H13B              | 0.9800           |
| C13-H13C              | 0.9800           |
| N16-N17A              | 1.213(14)        |
| N17A-N18A             | 1.129(13)        |
|                       |                  |
| <b>Atom-Atom-Atom</b> | <b>Angle [°]</b> |
| N10-Cu3-Cu4           | 40.49(13)        |
| N10-Cu3-N7            | 80.55(18)        |
| N10-Cu3-O1            | 90.2(2)          |
| N7-Cu3-Cu4            | 40.64(13)        |
| N7-Cu3-O1             | 93.63(19)        |
| O1-Cu3-Cu4            | 97.80(14)        |
| C5-Cu3-Cu4            | 134.46(19)       |

|             |            |
|-------------|------------|
| C5-Cu3-N10  | 96.2(2)    |
| C5-Cu3-N7   | 170.8(2)   |
| C5-Cu3-O1   | 95.0(3)    |
| C6-Cu3-Cu4  | 132.28(19) |
| C6-Cu3-N10  | 169.0(3)   |
| C6-Cu3-N7   | 94.1(2)    |
| C6-Cu3-O1   | 99.8(3)    |
| C6-Cu3-C5   | 87.6(3)    |
| N22-Cu7-Cu8 | 40.02(12)  |
| N22-Cu7-O3  | 86.23(18)  |
| O3-Cu7-Cu8  | 91.45(12)  |
| N19-Cu7-Cu8 | 40.23(13)  |
| N19-Cu7-N22 | 79.98(18)  |
| N19-Cu7-O3  | 90.37(19)  |
| C20-Cu7-Cu8 | 134.68(19) |
| C20-Cu7-N22 | 96.1(2)    |
| C20-Cu7-O3  | 97.0(3)    |
| C20-Cu7-N19 | 171.5(3)   |
| C19-Cu7-Cu8 | 136.02(19) |
| C19-Cu7-N22 | 175.0(3)   |
| C19-Cu7-O3  | 97.3(3)    |
| C19-Cu7-N19 | 96.5(2)    |
| C19-Cu7-C20 | 87.0(3)    |
| N10-Cu4-Cu3 | 40.65(13)  |
| N10-Cu4-N7  | 81.01(18)  |
| N10-Cu4-O2  | 88.91(18)  |
| N7-Cu4-Cu3  | 40.94(12)  |
| N7-Cu4-O2   | 89.20(18)  |
| O2-Cu4-Cu3  | 94.10(12)  |
| C7-Cu4-Cu3  | 137.09(18) |
| C7-Cu4-N10  | 176.4(2)   |
| C7-Cu4-N7   | 97.2(2)    |
| C7-Cu4-O2   | 94.2(2)    |
| C7-Cu4-C8   | 87.6(3)    |
| C8-Cu4-Cu3  | 131.96(18) |
| C8-Cu4-N10  | 93.7(2)    |
| C8-Cu4-N7   | 169.4(2)   |
| C8-Cu4-O2   | 99.9(2)    |
| N22-Cu8-Cu7 | 40.34(13)  |
| N22-Cu8-N19 | 80.36(18)  |
| N22-Cu8-O4  | 91.7(2)    |
| N19-Cu8-Cu7 | 40.31(13)  |
| N19-Cu8-O4  | 94.2(2)    |
| O4-Cu8-Cu7  | 97.55(14)  |
| C22-Cu8-Cu7 | 133.88(18) |
| C22-Cu8-N22 | 168.4(2)   |
| C22-Cu8-N19 | 95.8(2)    |
| C22-Cu8-O4  | 99.5(3)    |
| C22-Cu8-C21 | 87.9(3)    |
| C21-Cu8-Cu7 | 133.14(19) |
| C21-Cu8-N22 | 94.3(2)    |
| C21-Cu8-N19 | 170.3(2)   |
| C21-Cu8-O4  | 94.0(3)    |
| N13-Cu6-Cu5 | 39.31(14)  |
| N13-Cu6-N16 | 78.40(19)  |
| C18-Cu6-Cu5 | 137.94(18) |
| C18-Cu6-N13 | 173.4(2)   |
| C18-Cu6-N16 | 98.7(2)    |

|             |            |
|-------------|------------|
| C17-Cu6-Cu5 | 134.14(19) |
| C17-Cu6-N13 | 97.9(2)    |
| C17-Cu6-C18 | 86.4(3)    |
| C17-Cu6-N16 | 164.6(2)   |
| N16-Cu6-Cu5 | 39.29(14)  |
| N1-Cu2-Cu1  | 39.14(14)  |
| N1-Cu2-N4   | 78.18(19)  |
| N1-Cu2-C4   | 98.8(2)    |
| N4-Cu2-Cu1  | 39.05(13)  |
| C3-Cu2-Cu1  | 136.39(18) |
| C3-Cu2-N1   | 175.2(2)   |
| C3-Cu2-N4   | 97.3(2)    |
| C3-Cu2-C4   | 85.9(3)    |
| C4-Cu2-Cu1  | 136.6(2)   |
| C4-Cu2-N4   | 168.1(3)   |
| N13-Cu5-Cu6 | 39.17(14)  |
| C15-Cu5-Cu6 | 133.6(2)   |
| C15-Cu5-N13 | 171.6(3)   |
| C15-Cu5-N16 | 94.4(2)    |
| C16-Cu5-Cu6 | 139.2(2)   |
| C16-Cu5-N13 | 100.0(2)   |
| C16-Cu5-C15 | 87.1(3)    |
| C16-Cu5-N16 | 175.6(3)   |
| N16-Cu5-Cu6 | 39.20(13)  |
| N16-Cu5-N13 | 78.17(19)  |
| N1-Cu1-Cu2  | 38.73(13)  |
| N1-Cu1-C1   | 95.9(3)    |
| N4-Cu1-Cu2  | 39.14(14)  |
| N4-Cu1-N1   | 77.85(19)  |
| N4-Cu1-C1   | 173.3(3)   |
| C1-Cu1-Cu2  | 134.6(2)   |
| C2-Cu1-Cu2  | 139.2(3)   |
| C2-Cu1-N1   | 172.2(3)   |
| C2-Cu1-N4   | 100.4(3)   |
| C2-Cu1-C1   | 85.5(4)    |
| Cu4-N10-Cu3 | 98.87(19)  |
| N11-N10-Cu3 | 125.2(4)   |
| N11-N10-Cu4 | 118.9(4)   |
| N9-N8-N7    | 179.0(6)   |
| Cu8-N22-Cu7 | 99.64(19)  |
| N23-N22-Cu7 | 119.4(4)   |
| N23-N22-Cu8 | 122.7(4)   |
| Cu4-N7-Cu3  | 98.42(19)  |
| N8-N7-Cu3   | 120.1(4)   |
| N8-N7-Cu4   | 120.9(4)   |
| C23-O3-Cu7  | 146.2(5)   |
| N12-N11-N10 | 178.9(6)   |
| N24-N23-N22 | 178.9(6)   |
| N3-N2-N1    | 178.4(6)   |
| Cu8-N19-Cu7 | 99.46(19)  |
| N20-N19-Cu7 | 122.5(4)   |
| N20-N19-Cu8 | 121.9(4)   |
| C12-O2-Cu4  | 150.5(5)   |
| Cu2-N1-Cu1  | 102.1(2)   |
| N2-N1-Cu2   | 126.4(4)   |
| N2-N1-Cu1   | 128.1(4)   |
| Cu1-N4-Cu2  | 101.8(2)   |
| N5-N4-Cu2   | 127.5(4)   |

|               |           |
|---------------|-----------|
| N5-N4-Cu1     | 130.2(4)  |
| C9-O1-Cu3     | 170.3(6)  |
| N21-N20-N19   | 179.2(7)  |
| Cu6-N13-Cu5   | 101.5(2)  |
| N14-N13-Cu6   | 126.3(4)  |
| N14-N13-Cu5   | 132.0(4)  |
| N15-N14-N13   | 179.5(8)  |
| C26-O4-Cu8    | 169.4(7)  |
| F36-C18-Cu6   | 116.9(4)  |
| F36-C18-F35   | 104.8(5)  |
| F36-C18-F34   | 108.6(5)  |
| F35-C18-Cu6   | 106.2(4)  |
| F34-C18-Cu6   | 112.7(4)  |
| F34-C18-F35   | 106.8(5)  |
| N6-N5-N4      | 179.3(9)  |
| F26-C15-Cu5   | 106.9(4)  |
| F26-C15-F25   | 103.4(6)  |
| F25-C15-Cu5   | 107.8(4)  |
| F27-C15-Cu5   | 123.1(5)  |
| F27-C15-F26   | 108.6(6)  |
| F27-C15-F25   | 105.4(6)  |
| N18B-N17B-N16 | 173(3)    |
| F48A-C22-Cu8  | 115.1(6)  |
| F48A-C22-F47A | 104.4(7)  |
| F47A-C22-Cu8  | 110.7(5)  |
| F46A-C22-Cu8  | 111.4(5)  |
| F46A-C22-F48A | 112.4(8)  |
| F46A-C22-F47A | 101.9(7)  |
| F46B-C22-Cu8  | 113.1(8)  |
| F46B-C22-F47B | 115.0(14) |
| F46B-C22-F48B | 102.7(12) |
| F47B-C22-Cu8  | 118.0(10) |
| F47B-C22-F48B | 100.7(10) |
| F48B-C22-Cu8  | 104.4(6)  |
| F7-C3-Cu2     | 107.4(4)  |
| F9-C3-Cu2     | 118.3(4)  |
| F9-C3-F7      | 103.2(5)  |
| F8-C3-Cu2     | 111.1(4)  |
| F8-C3-F7      | 106.7(5)  |
| F8-C3-F9      | 109.3(5)  |
| O1-C9-C11     | 121.8(7)  |
| O1-C9-C10     | 120.8(7)  |
| C10-C9-C11    | 117.4(6)  |
| F29-C16-Cu5   | 113.2(5)  |
| F29-C16-F30   | 107.6(5)  |
| F29-C16-F28   | 108.4(6)  |
| F30-C16-Cu5   | 114.4(5)  |
| F28-C16-Cu5   | 108.6(4)  |
| F28-C16-F30   | 104.1(6)  |
| F41A-C20-Cu7  | 115.8(5)  |
| F41A-C20-F40A | 101.6(6)  |
| F40A-C20-Cu7  | 107.3(4)  |
| F42A-C20-Cu7  | 111.3(5)  |
| F42A-C20-F41A | 107.1(7)  |
| F42A-C20-F40A | 113.5(7)  |
| F42B-C20-Cu7  | 108.4(8)  |
| F41B-C20-Cu7  | 121.7(17) |
| F41B-C20-F42B | 92.9(19)  |

|               |           |
|---------------|-----------|
| F41B-C20-F40B | 102(2)    |
| F40B-C20-Cu7  | 117.2(15) |
| F40B-C20-F42B | 112(2)    |
| F33-C17-Cu6   | 106.4(4)  |
| F32-C17-Cu6   | 110.3(4)  |
| F32-C17-F33   | 107.6(6)  |
| F32-C17-F31   | 108.9(6)  |
| F31-C17-Cu6   | 118.1(5)  |
| F31-C17-F33   | 105.0(5)  |
| F20-C7-Cu4    | 114.4(4)  |
| F20-C7-F21    | 108.2(5)  |
| F20-C7-F19    | 106.0(5)  |
| F21-C7-Cu4    | 112.0(4)  |
| F21-C7-F19    | 107.1(5)  |
| F19-C7-Cu4    | 108.6(4)  |
| F14A-C5-Cu3   | 111.5(6)  |
| F14A-C5-F15A  | 106.8(7)  |
| F15A-C5-Cu3   | 113.2(5)  |
| F13A-C5-Cu3   | 110.2(5)  |
| F13A-C5-F14A  | 108.7(9)  |
| F13A-C5-F15A  | 106.1(7)  |
| F15B-C5-Cu3   | 111.9(10) |
| F15B-C5-F14B  | 114.6(16) |
| F15B-C5-F13B  | 104.5(13) |
| F14B-C5-Cu3   | 118.9(13) |
| F14B-C5-F13B  | 99.4(12)  |
| F13B-C5-Cu3   | 105.0(7)  |
| F43A-C21-Cu8  | 120.3(6)  |
| F43A-C21-F45A | 101.5(7)  |
| F45A-C21-Cu8  | 107.3(5)  |
| F44A-C21-Cu8  | 111.3(6)  |
| F44A-C21-F43A | 109.3(9)  |
| F44A-C21-F45A | 105.8(8)  |
| F44B-C21-Cu8  | 111.6(8)  |
| F44B-C21-F45B | 119.5(15) |
| F44B-C21-F43B | 101.2(13) |
| F45B-C21-Cu8  | 112.9(10) |
| F45B-C21-F43B | 98.9(12)  |
| F43B-C21-Cu8  | 111.0(8)  |
| C9-C11-H11A   | 109.5     |
| C9-C11-H11B   | 109.5     |
| C9-C11-H11C   | 109.5     |
| H11A-C11-H11B | 109.5     |
| H11A-C11-H11C | 109.5     |
| H11B-C11-H11C | 109.5     |
| F22-C8-Cu4    | 120.4(4)  |
| F22-C8-F23    | 107.2(5)  |
| F22-C8-F24    | 104.7(5)  |
| F23-C8-Cu4    | 108.4(4)  |
| F23-C8-F24    | 106.2(6)  |
| F24-C8-Cu4    | 109.1(4)  |
| O4-C26-C28    | 122.1(8)  |
| O4-C26-C27    | 124.6(9)  |
| C27-C26-C28   | 113.3(8)  |
| F17A-C6-Cu3   | 108.3(5)  |
| F17A-C6-F18A  | 106.0(7)  |
| F16A-C6-Cu3   | 122.3(6)  |
| F16A-C6-F17A  | 104.2(7)  |

|               |           |
|---------------|-----------|
| F16A-C6-F18A  | 107.3(8)  |
| F18A-C6-Cu3   | 107.6(5)  |
| F18B-C6-Cu3   | 112.6(9)  |
| F18B-C6-F16B  | 95.0(16)  |
| F16B-C6-Cu3   | 108.5(11) |
| F17B-C6-Cu3   | 113.0(11) |
| F17B-C6-F18B  | 106.5(16) |
| F17B-C6-F16B  | 119.8(18) |
| F39A-C19-Cu7  | 116.0(5)  |
| F39A-C19-F38A | 100.5(6)  |
| F38A-C19-Cu7  | 108.3(4)  |
| F37A-C19-Cu7  | 113.4(5)  |
| F37A-C19-F39A | 107.8(7)  |
| F37A-C19-F38A | 109.9(7)  |
| F37B-C19-Cu7  | 104.7(10) |
| F37B-C19-F38B | 105(3)    |
| F37B-C19-F39B | 108(2)    |
| F38B-C19-Cu7  | 113(3)    |
| F39B-C19-Cu7  | 125.7(17) |
| F39B-C19-F38B | 99(3)     |
| F11-C4-Cu2    | 115.8(5)  |
| F11-C4-F10    | 108.1(6)  |
| F10-C4-Cu2    | 112.0(5)  |
| F12-C4-Cu2    | 108.4(4)  |
| F12-C4-F11    | 105.4(6)  |
| F12-C4-F10    | 106.5(6)  |
| O3-C23-C25    | 119.4(7)  |
| O3-C23-C24    | 121.0(7)  |
| C24-C23-C25   | 119.6(7)  |
| F2-C1-Cu1     | 120.3(6)  |
| F2-C1-F1      | 100.4(6)  |
| F2-C1-F3      | 116.4(6)  |
| F1-C1-Cu1     | 105.1(4)  |
| F3-C1-Cu1     | 109.9(5)  |
| F3-C1-F1      | 101.6(7)  |
| O2-C12-C14    | 121.2(8)  |
| O2-C12-C13    | 120.0(8)  |
| C13-C12-C14   | 118.8(7)  |
| C26-C28-H28A  | 109.5     |
| C26-C28-H28B  | 109.5     |
| C26-C28-H28C  | 109.5     |
| H28A-C28-H28B | 109.5     |
| H28A-C28-H28C | 109.5     |
| H28B-C28-H28C | 109.5     |
| C23-C25-H25A  | 109.5     |
| C23-C25-H25B  | 109.5     |
| C23-C25-H25C  | 109.5     |
| H25A-C25-H25B | 109.5     |
| H25A-C25-H25C | 109.5     |
| H25B-C25-H25C | 109.5     |
| F5-C2-Cu1     | 111.1(5)  |
| F5-C2-F4      | 101.1(7)  |
| F6-C2-Cu1     | 117.5(6)  |
| F6-C2-F5      | 112.9(9)  |
| F6-C2-F4      | 102.9(6)  |
| F4-C2-Cu1     | 109.7(7)  |
| C12-C14-H14A  | 109.5     |
| C12-C14-H14B  | 109.5     |

|               |       |
|---------------|-------|
| C12-C14-H14C  | 109.5 |
| H14A-C14-H14B | 109.5 |
| H14A-C14-H14C | 109.5 |
| H14B-C14-H14C | 109.5 |
| C23-C24-H24A  | 109.5 |
| C23-C24-H24B  | 109.5 |
| C23-C24-H24C  | 109.5 |
| H24A-C24-H24B | 109.5 |
| H24A-C24-H24C | 109.5 |
| H24B-C24-H24C | 109.5 |
| C9-C10-H10A   | 109.5 |
| C9-C10-H10B   | 109.5 |
| C9-C10-H10C   | 109.5 |
| H10A-C10-H10B | 109.5 |
| H10A-C10-H10C | 109.5 |
| H10B-C10-H10C | 109.5 |
| C26-C27-H27A  | 109.5 |
| C26-C27-H27B  | 109.5 |
| C26-C27-H27C  | 109.5 |

|               |           |
|---------------|-----------|
| H27A-C27-H27B | 109.5     |
| H27A-C27-H27C | 109.5     |
| H27B-C27-H27C | 109.5     |
| C12-C13-H13A  | 109.5     |
| C12-C13-H13B  | 109.5     |
| C12-C13-H13C  | 109.5     |
| H13A-C13-H13B | 109.5     |
| H13A-C13-H13C | 109.5     |
| H13B-C13-H13C | 109.5     |
| Cu6-N16-Cu5   | 101.5(2)  |
| N17B-N16-Cu6  | 127.5(16) |
| N17B-N16-Cu5  | 125.6(16) |
| N17A-N16-Cu6  | 128.5(10) |
| N17A-N16-Cu5  | 129.9(10) |
| N18A-N17A-N16 | 177(3)    |

Table 7. Torsion angles for  $4 \cdot 0.5\text{C}_3\text{H}_6\text{O}$

| Atom-Atom-Atom-Atom | Torsion Angle [°] |
|---------------------|-------------------|
| Cu7-O3-C23-C25      | -75.2(11)         |
| Cu7-O3-C23-C24      | 108.1(10)         |
| Cu4-O2-C12-C14      | -61.0(13)         |
| Cu4-O2-C12-C13      | 121.5(11)         |
| Cu8-O4-C26-C28      | 17(4)             |
| Cu8-O4-C26-C27      | -163(3)           |

## Synthesis of $\mu_2$ -(dimethylamino)- $\mu_2$ -hydroxy-dicopper(III) complex **5**

### $[(F_3C)_2Cu(\mu_2-OH)(\mu_2-NMe_2)Cu(CF_3)_2]$

In a 10 ml Schlenk tube under argon atmosphere to the solid heterocubane **1** (21.8 mg, 0.025 mmol [0.1 mmol monomer]) dry dichloromethane (1 ml) was added and the mixture was cooled to  $-78^\circ\text{C}$  (acetone/dry ice). (N,N-Dimethylamino)trimethylsilane (8  $\mu\text{l}$ , 0.05 mmol, 0.5 equiv.) was added with vigorous stirring via syringe. The resulting orange mixture was stirred at  $-78^\circ\text{C}$  for 30 minutes, then layered with pentane (ca. 3 ml). Crystallization in the freezer at  $-80^\circ\text{C}$  for 2 days afforded orange crystals of dimeric  $\mu_2$ -(dimethylamino)- $\mu_2$ -hydroxy-tetrakis(trifluoromethyl)dicopper(III) **5** (5.6 mg, 24%), which were immediately collected for X-ray and other measurements. The compound undergoes slow decomposition even at  $-78^\circ\text{C}$ , and decomposes within minutes at ambient conditions to form dark green residue.  $^1\text{H NMR}$  ( $\text{CD}_2\text{Cl}_2$ , 400 MHz, 213 K):  $\delta$  2.50 (br s, OH), 1.18 (br s, 3H, Me), 0.88 (br s, 3H, Me);  $^{19}\text{F NMR}$  (376 MHz,  $\text{CD}_2\text{Cl}_2$ , 213 K):  $\delta$   $-30.2$  (br s, 6F); **IR** (ATR):  $\tilde{\nu} = 3652, 2969, 1477, 1261, 1097, 958, 723, 864, 547 \text{ cm}^{-1}$ ; **CCDC** 2533528.

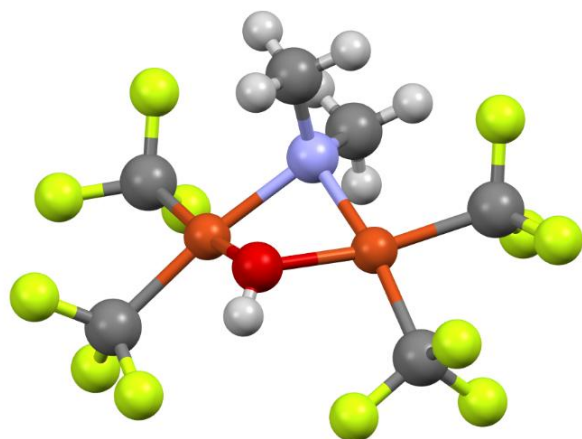

Figure S6. Crystal structure of tetrakis(trifluoromethyl)- $\mu_2$ -(hydroxy)- $\mu_2$ -(dimethylamino)dicopper(III) **5**

Table 8. Crystal data and structure refinement for **5**

|                                           |                                                              |
|-------------------------------------------|--------------------------------------------------------------|
| CCDC number                               | 2533533                                                      |
| Empirical formula                         | $\text{C}_9\text{H}_{13}\text{Cu}_2\text{F}_{12}\text{NO}_2$ |
| Formula weight                            | 522.28                                                       |
| Temperature [K]                           | 150.00                                                       |
| Crystal system                            | orthorhombic                                                 |
| Space group (number)                      | $P2_12_12_1$ (19)                                            |
| $a$ [Å]                                   | 6.9282(4)                                                    |
| $b$ [Å]                                   | 10.9375(8)                                                   |
| $c$ [Å]                                   | 22.2948(17)                                                  |
| $\alpha$ [°]                              | 90                                                           |
| $\beta$ [°]                               | 90                                                           |
| $\gamma$ [°]                              | 90                                                           |
| Volume [Å <sup>3</sup> ]                  | 1689.4(2)                                                    |
| $Z$                                       | 4                                                            |
| $\rho_{\text{calc}}$ [gcm <sup>-3</sup> ] | 2.053                                                        |
| $\mu$ [mm <sup>-1</sup> ]                 | 2.646                                                        |
| $F(000)$                                  | 1024                                                         |
| Crystal size [mm <sup>3</sup> ]           | 0.37×0.431×0.463                                             |

|                                           |                                                                    |
|-------------------------------------------|--------------------------------------------------------------------|
| Crystal colour                            | orange                                                             |
| Crystal shape                             | block                                                              |
| Radiation                                 | $\text{MoK}\alpha$ ( $\lambda=0.71073 \text{ \AA}$ )               |
| $2\theta$ range [°]                       | 4.15 to 50.73 (0.83 Å)                                             |
| Index ranges                              | $-8 \leq h \leq 8$<br>$-13 \leq k \leq 13$<br>$-26 \leq l \leq 26$ |
| Reflections collected                     | 30495                                                              |
| Independent reflections                   | 3113<br>$R_{\text{int}} = 0.0701$<br>$R_{\text{sigma}} = 0.0308$   |
| Completeness to $\theta = 25.242^\circ$   | 99.9 %                                                             |
| Data / Restraints / Parameters            | 3113 / 2 / 206                                                     |
| Absorption correction                     | 0.4914 / 0.7452                                                    |
| $T_{\text{min}}/T_{\text{max}}$ (method)  | (multi-scan)                                                       |
| Goodness-of-fit on $F^2$                  | 1.047                                                              |
| Final $R$ indexes [ $I \geq 2\sigma(I)$ ] | $R_1 = 0.0298$<br>$wR_2 = 0.0756$                                  |

|                                          |                                   |
|------------------------------------------|-----------------------------------|
| Final $R$ indexes<br>[all data]          | $R_1 = 0.0338$<br>$wR_2 = 0.0786$ |
| Largest peak/hole [ $e\text{\AA}^{-3}$ ] | 0.57/-0.48                        |
| Flack $X$ parameter                      | 0.45(2)                           |

Table 9. Bond lengths and angles for **5**

| Atom–Atom      | Length [Å] |
|----------------|------------|
| Cu2–Cu1        | 2.7034(9)  |
| Cu2–O1         | 1.850(4)   |
| Cu2–N1         | 1.948(5)   |
| Cu2–C3         | 1.947(6)   |
| Cu2–C4         | 1.931(7)   |
| Cu1–O1         | 1.878(4)   |
| Cu1–N1         | 1.959(5)   |
| Cu1–C2         | 1.940(7)   |
| Cu1–C1         | 1.925(6)   |
| F7–C3          | 1.345(7)   |
| F3–C1          | 1.337(7)   |
| F2–C1          | 1.323(7)   |
| F4–C2          | 1.335(7)   |
| F9–C3          | 1.335(7)   |
| F6–C2          | 1.365(7)   |
| F1–C1          | 1.352(7)   |
| F5–C2          | 1.339(7)   |
| O1–H1          | 0.80(3)    |
| F11–C4         | 1.341(8)   |
| F10–C4         | 1.327(9)   |
| F12–C4         | 1.353(8)   |
| F8–C3          | 1.337(7)   |
| N1–C6          | 1.477(8)   |
| N1–C5          | 1.486(7)   |
| C6–H6A         | 0.9800     |
| C6–H6B         | 0.9800     |
| C6–H6C         | 0.9800     |
| C5–H5A         | 0.9800     |
| C5–H5B         | 0.9800     |
| C5–H5C         | 0.9800     |
|                |            |
| Atom–Atom–Atom | Angle [°]  |
| O1–Cu2–Cu1     | 43.92(12)  |
| O1–Cu2–N1      | 80.23(19)  |
| O1–Cu2–C3      | 94.6(2)    |
| O1–Cu2–C4      | 166.4(3)   |
| N1–Cu2–Cu1     | 46.40(14)  |
| C3–Cu2–Cu1     | 124.39(18) |
| C3–Cu2–N1      | 169.8(2)   |
| C4–Cu2–Cu1     | 140.2(2)   |
| C4–Cu2–N1      | 97.4(3)    |
| C4–Cu2–C3      | 89.7(3)    |
| O1–Cu1–Cu2     | 43.10(12)  |
| O1–Cu1–N1      | 79.26(19)  |
| O1–Cu1–C2      | 95.0(2)    |
| O1–Cu1–C1      | 167.9(2)   |
| N1–Cu1–Cu2     | 46.06(14)  |
| C2–Cu1–Cu2     | 126.47(19) |
| C2–Cu1–N1      | 172.5(2)   |

|            |            |
|------------|------------|
| C1–Cu1–Cu2 | 139.09(19) |
| C1–Cu1–N1  | 97.0(2)    |
| C1–Cu1–C2  | 89.6(3)    |
| Cu2–O1–Cu1 | 92.98(18)  |
| Cu2–O1–H1  | 118(3)     |
| Cu1–O1–H1  | 114(3)     |
| Cu2–N1–Cu1 | 87.5(2)    |
| C6–N1–Cu2  | 117.0(4)   |
| C6–N1–Cu1  | 118.3(4)   |
| C6–N1–C5   | 110.3(5)   |
| C5–N1–Cu2  | 111.7(4)   |
| C5–N1–Cu1  | 110.3(4)   |
| N1–C6–H6A  | 109.5      |
| N1–C6–H6B  | 109.5      |
| N1–C6–H6C  | 109.5      |
| H6A–C6–H6B | 109.5      |
| H6A–C6–H6C | 109.5      |
| H6B–C6–H6C | 109.5      |
| F4–C2–Cu1  | 114.2(4)   |
| F4–C2–F6   | 105.9(5)   |
| F4–C2–F5   | 107.0(5)   |
| F6–C2–Cu1  | 109.6(4)   |
| F5–C2–Cu1  | 115.0(4)   |
| F5–C2–F6   | 104.4(5)   |
| F3–C1–Cu1  | 111.1(4)   |
| F3–C1–F1   | 103.6(5)   |
| F2–C1–Cu1  | 110.8(4)   |
| F2–C1–F3   | 107.6(5)   |
| F2–C1–F1   | 106.4(5)   |
| F1–C1–Cu1  | 116.7(4)   |
| N1–C5–H5A  | 109.5      |
| N1–C5–H5B  | 109.5      |
| N1–C5–H5C  | 109.5      |
| H5A–C5–H5B | 109.5      |
| H5A–C5–H5C | 109.5      |
| H5B–C5–H5C | 109.5      |
| F7–C3–Cu2  | 109.4(4)   |
| F9–C3–Cu2  | 114.8(4)   |
| F9–C3–F7   | 105.5(5)   |
| F9–C3–F8   | 107.3(5)   |
| F8–C3–Cu2  | 114.0(4)   |
| F8–C3–F7   | 105.1(5)   |
| F11–C4–Cu2 | 110.4(5)   |
| F11–C4–F12 | 105.0(6)   |
| F10–C4–Cu2 | 110.8(5)   |
| F10–C4–F11 | 108.5(6)   |
| F10–C4–F12 | 106.5(6)   |
| F12–C4–Cu2 | 115.3(5)   |

Table 10. Torsion angles for **5**

| Atom–Atom–Atom–Atom | Torsion Angle [°] |
|---------------------|-------------------|
|---------------------|-------------------|

|               |            |
|---------------|------------|
| N1–Cu2–O1–Cu1 | 33.90(18)  |
| N1–Cu1–O1–Cu2 | –33.80(18) |

|               |            |
|---------------|------------|
| C2-Cu1-O1-Cu2 | 141.3(2)   |
| C1-Cu1-O1-Cu2 | -107.0(11) |
| C3-Cu2-O1-Cu1 | -137.2(2)  |
| C4-Cu2-O1-Cu1 | 114.8(10)  |

## Calculations and oxidation state analysis of complexes

The optimization of geometries for compounds in solution was done at the B3LYP level<sup>[8]</sup> with Zero-Order Regular Approximation relativistic Hamiltonian<sup>[9]</sup> using the ZORA-def2-TZVP<sup>[10]</sup> basis set with D3(BJ)<sup>[11]</sup> dispersion correction as implemented in the ORCA 6.1.0 software<sup>[12]</sup> (defgrid 3) for singlet state of all complexes **3-5**. The solvent environment was represented as CPCM(DCM)<sup>[13]</sup> solvation model. The single point energy calculations were done at the  $\omega$ B97X-D3(BJ)<sup>[11]</sup>/def2-TZVPPD level of theory (method 1) or at the DLPNO-CCSD(T)<sup>[14]</sup>/ZORA-def2-TZVP<sup>[10]</sup> level with an improved tightPNO implementation<sup>[15]</sup> (method 2) using the B3LYP-D3(BJ)<sup>[11]</sup>/ZORA-def2-TZVP optimal geometries. Vibrational frequencies and thermochemistry were calculated on the same level as geometries; final results of optimization contain no imaginary frequencies. The computed geometry can be found in the separately provided .xyz files. Natural bonding orbital (NBO)<sup>[16]</sup> analysis including NPA charge calculations was performed on  $\omega$ B97X-D3(BJ)/def2-QZVPPD level of theory using the B3LYP-D3(BJ)/ZORA-def2-TZVP optimal geometries. Visualization of the orbitals was accomplished using ChemCraft<sup>[17]</sup> and IboView<sup>[18]</sup> software. OSLO<sup>[19]</sup> oxidation state analysis was performed using APOST-3D<sup>[20]</sup> program with a Topological Fuzzy-Voronoi cells (TFVC)<sup>[21]</sup> approximation, where copper atoms, bridging ligands, and CF<sub>3</sub> groups were identified as separate fragments for orbital localization.

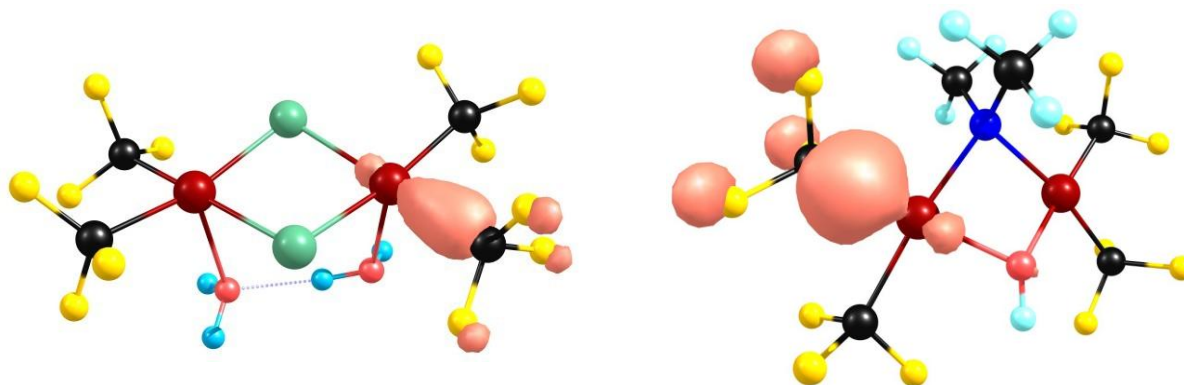

Figure S7. Illustration of the last localized orbitals in OSLO for chloride complex **3** (left) and amino complex **5** (right).

## Transformations and applications of complexes

### Synthesis of vinyl azides **7** from copper(III) azide **4**

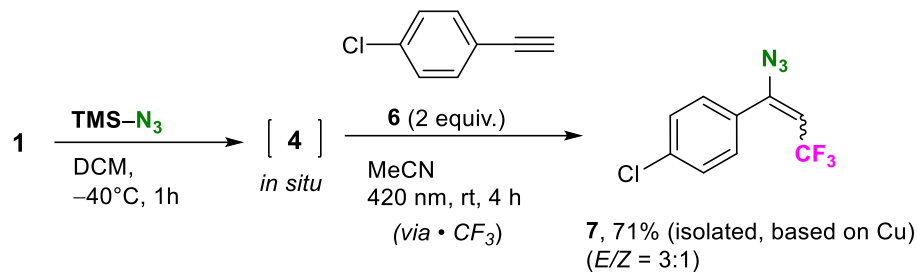

In a 10 ml round-bottomed Schlenk flask under argon atmosphere, a solution of heterocubane **1** (21.8 mg, 0.025 mmol [0.1 mmol monomer]) in acetonitrile (1.5 ml) was cooled to  $-40^\circ\text{C}$ . TMSN<sub>3</sub> (26.3  $\mu\text{l}$ , 0.2 mmol, 2 equiv.) was added with vigorous stirring under positive pressure of argon. The mixture was additionally stirred for 1 hour at  $-40^\circ\text{C}$ , then ammonium persulfate (45 mg, 0.2 mmol, 2 equiv.) and 1-chloro-4-ethynylbenzene **6** (27 mg, 0.2 mmol, 2 equiv.) were sequentially added. The mixture was taken out of the cooling bath and irradiated by 420 nm LED (2\*30 W) for 4 hours, while warming up to room temperature. Afterwards it was directly subjected to column chromatography in pentane to give vinyl azides (*E*)-**7a** (13.1 mg) and (*Z*)-**7b** (4.4 mg) as colorless oils. Total yield 17.5 mg, 71% based on Cu(III).

**Major isomer** ((*E*)-1-(1-azido-3,3,3-trifluoroprop-1-en-1-yl)-4-chlorobenzene): <sup>1</sup>H NMR (400 MHz, CDCl<sub>3</sub>):  $\delta$  7.46-7.42 (m, 2H), 7.34-7.30 (m, 2H), 5.55 (q, *J* = 7.7 Hz, 1H); <sup>13</sup>C NMR (101 MHz, CDCl<sub>3</sub>):  $\delta$  149.0 (br s), 136.8, 131.7, 129.7, 129.2, 122.9 (q, *J* = 268.5 Hz), 105.3 (q, *J* = 36.0 Hz); <sup>19</sup>F NMR (376 MHz, CDCl<sub>3</sub>)  $\delta$  -54.5 (d, *J* = 7.7 Hz, 3F). Characterization matches previously reported data.<sup>[22]</sup> **Minor isomer** ((*Z*)-1-(1-azido-3,3,3-trifluoroprop-1-en-1-yl)-4-chlorobenzene): <sup>1</sup>H NMR (400 MHz, CDCl<sub>3</sub>):  $\delta$  7.48-7.46 (m, 2H), 7.40-7.38 (m, 2H), 5.25 (q, *J* = 7.8 Hz, 1H); <sup>13</sup>C NMR (101 MHz, CDCl<sub>3</sub>):  $\delta$  137.2, 131.7, 130.2, 129.7, 128.8, 122.3 (q, *J* = 270.4 Hz), 105.7 (q, *J* = 36.1 Hz); <sup>19</sup>F NMR (376 MHz, CDCl<sub>3</sub>)  $\delta$  -57.3 (d, *J* = 7.8 Hz, 3F).

### Difluoromethylation of alcohol

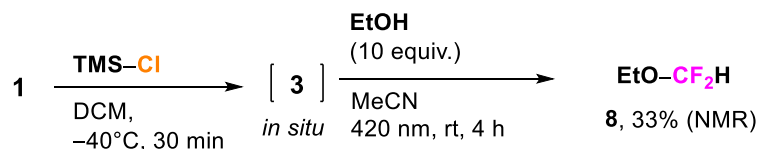

In a 10 ml round-bottomed Schlenk flask under argon atmosphere to the solid heterocubane **1** (11.0 mg, 0.0125 mmol [0.05 mmol monomer]) acetonitrile (1 ml) was added and the mixture was cooled to  $-40^\circ\text{C}$ . Trimethylsilyl chloride (25  $\mu\text{l}$ , 0.2 mmol, 2 equiv.) was added with vigorous stirring. The mixture was stirred at  $-40^\circ\text{C}$  for 1 hour; during this time the solution turned intensive yellow. Then ethanol (28  $\mu\text{l}$ , 0.5

mmol, 10 equiv.) was added in one portion under argon, and the mixture was taken out of the cooling bath and irradiated by 420 nm LED (2\*30 W) for 4 hours, while warming up to room temperature. Then C<sub>6</sub>F<sub>6</sub> (0.1 mmol) was added and the mixture was analyzed by <sup>19</sup>F NMR, which indicated formation of EtO–CF<sub>2</sub>H **8** (δ = –84.0 ppm) in 33% yield. NMR matched previously reported data.<sup>[23]</sup>

#### Formation of *N*-trifluoromethylamine **9** via reductive elimination in **5**

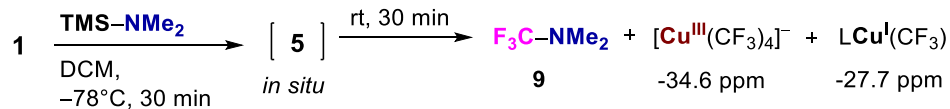

In a 10 ml round-bottomed Schlenk flask under argon atmosphere to the solid heterocubane **1** (21.8 mg, 0.025 mmol [0.1 mmol monomer]) dry CD<sub>2</sub>Cl<sub>2</sub> (0.7 ml) was added and the mixture was cooled to –78°C (dry ice/acetone). (N,N-Dimethylamino)trimethylsilane (8 μl, 0.05 mmol, 0.5 equiv.) was added with vigorous stirring. The mixture was stirred 1 hour; <sup>19</sup>F NMR (at –60°C) indicated formation of **5**. Then C<sub>6</sub>F<sub>6</sub> (0.1 mmol) was added and the mixture was warmed up to room temperature upon vigorous stirring. The mixture turned dark green within 1-2 minutes, then the intensive color ceased. <sup>19</sup>F NMR recorded after 30 minutes indicated formation of *N*-trifluoromethylamine **9** Me<sub>2</sub>N–CF<sub>3</sub> (δ = –69.8 ppm),<sup>[23,24]</sup> [Cu(CF<sub>3</sub>)<sub>4</sub>]<sup>–</sup> (δ = –34.6 ppm)<sup>[25]</sup> and CuCF<sub>3</sub> species<sup>[26]</sup> (likely additionally coordinated to the amine or hydroxyl group) as by-products, as both [Cu<sup>III</sup>(CF<sub>3</sub>)<sub>4</sub>]<sup>–</sup> and [Cu<sup>I</sup>(CF<sub>3</sub>)<sub>2</sub>]<sup>–</sup> were detected by negative ESI-MS.

#### Control experiment with TEMPO

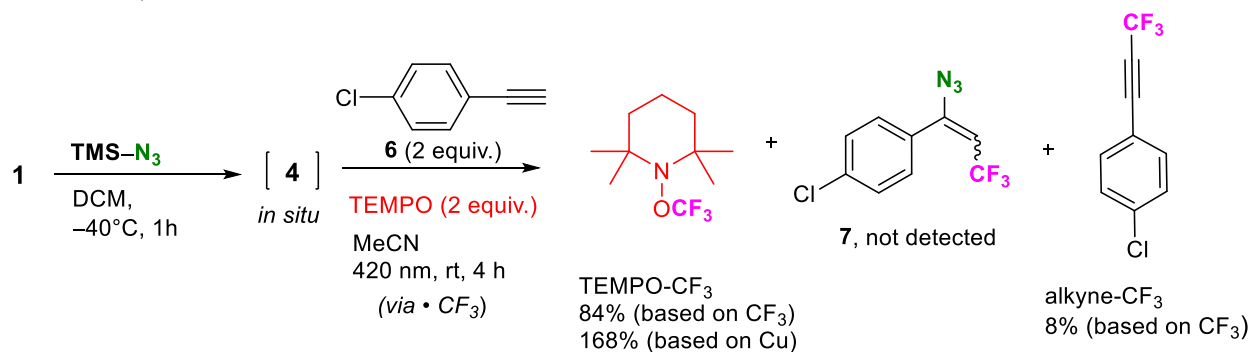

In a 10 ml round-bottomed Schlenk flask under argon atmosphere, a solution of heterocubane **1** (21.8 mg, 0.025 mmol [0.1 mmol monomer]) in acetonitrile (1.5 ml) was cooled to –40°C. TMSN<sub>3</sub> (26.3 μl, 0.2 mmol, 2 equiv.) was added with vigorous stirring under positive pressure of argon. The mixture was additionally stirred for 1 hour at –40°C, then ammonium persulfate (45 mg, 0.2 mmol, 2 equiv.), 4-chloro-1-ethynylbenzene **6** (27 mg, 0.2 mmol, 2 equiv.) and TEMPO (31 mg, 0.2 mmol, 2 equiv.) were sequentially added. The mixture was taken out of the cooling bath and irradiated by 420 nm LED (2\*30 W) for 4 hours, while warming up to room temperature. Then C<sub>6</sub>F<sub>6</sub> (0.1 mmol) was added and the mixture was analyzed by

<sup>19</sup>F NMR, which indicated formation of TEMPO-CF<sub>3</sub> adduct ( $\delta = -55.6$  ppm) in 84% yield based on CF<sub>3</sub> group (168% based on copper) and traces of CF<sub>3</sub>-alkyne ( $\delta = -50.0$  ppm).

## References

1. V. Motornov, N. Limberg, *Chem. Eur. J.* **2026**, 32(5), e03417.
2. Bruker, *SAINT, V8.41*, Bruker AXS Inc., Madison, Wisconsin, USA.
3. L. Krause, R. Herbst-Irmer, G. M. Sheldrick, D. Stalke, *J. Appl. Cryst.* **2015**, 48, 3–10, doi:10.1107/S1600576714022985.
4. G. M. Sheldrick, *Acta Cryst.* **2015**, A71, 3–8, doi:10.1107/S2053273314026370.
5. G. M. Sheldrick, *Acta Cryst.* **2015**, C71, 3–8, doi:10.1107/S2053229614024218.
6. C. R. Groom, I. J. Bruno, M. P. Lightfoot, S. C. Ward, *Acta Cryst.* **2016**, B72, 171–179, doi:10.1107/S2052520616003954.
7. D. Kratzert, *FinalCif, V152*, <https://dkratzert.de/finalcif.html>.
8. a) C. Lee, W. Yang, R. G. Parr, *Physical review. B, Condensed matter* **1988**, 37, 785; b) A. D. Becke, *Physical review. A, General physics* **1988**, 38, 3098.
9. a) M. Douglas, N. M. Kroll, *Ann. Phys.*, **1974**, 82, 89. b) B. A. Hess, *Phys. Rev. A*, **1985**, 32, 756. c) D. A. Pantazis, X.-Y. Chen, C. R. Landis, F. Neese, *J. Chem. Theor. Comput.*, **2008**, 4, 908.
10. a) F. Weigend, *Phys. Chem. Chem. Phys.* **2006**, 8, 1057; b) F. Weigend, R. Ahlrichs, *Phys. Chem. Chem. Phys.* **2005**, 7, 3297.
11. a) G. Brandenburg, J. W. Ochterski, K. A. Peterson, *J. Chem. Phys.* **2007**, 127, 154108. b) M. Sierka, A. Hogekamp, R. Ahlrichs, *J. Chem. Phys.* **2003**, 118, 9136; c) S. Grimme, S. Ehrlich, L. Goerigk, *J. Comput. Chem.* **2011**, 32, 1456; d) S. Grimme, J. Antony, S. Ehrlich, H. Krieg, *J. Chem. Phys.* **2010**, 132, 154104.
12. a) Neese, F. Software update: the ORCA program system, version 6.0, *WIRES Comput. Molec. Sci.* **2025**, 15, e70019. b) Neese, F., *J. Comp. Chem.* **2003** 24, 1740-1747; c) Neese, F.; Wennmohs, F.; Hansen, A.; Becker, U. *Chem. Phys.* 2009 356, 98-109; d) Grimme, S.; Antony, J.; Ehrlich, S.; Krieg, H. *J. Chem. Phys.* **2010** 132, 154104; e) Grimme, S.; Ehrlich, S.; Goerigk, L. *J. Comput. Chem.* **2011** 32, 1456-1465; f) Helmich-Paris, B.; de Souza, B.; Neese, F.; Izsák, R. *J. Chem. Phys.* **2021** 155, 104109; g) Neese, F. *J. Comp. Chem.* **2022** 44, 381.
13. M. Cossi, N. Rega, G. Scalmani and V. Barone, *J. Comput. Chem.*, **2003**, 24, 669–681.
14. C. Riplinger and F. Neese, *J. Chem. Phys.*, **2013**, 138, 034106.
15. C. Riplinger, P. Pinski, U. Becker, E. F. Valeev, and F. Neese, *J. Chem. Phys.*, **2016**, 144, 024109.
16. E. D. Glendening, C. R. Landis, F. Weinhold, *J. Comput. Chem.* **2019**, 40, 2234.
17. Chemcraft - graphical software for visualization of quantum chemistry computations. Version 1.8, build 682. <https://www.chemcraftprog.com>.
18. G. Knizia, *J. Chem. Theory Comput.* **2013**, 9, 4834–4843.
19. a) M. Gimferrer, A. Aldossary, P. Salvador, M. Head-Gordon, *J. Chem. Theor. Comput.*, **2022**, 18, 309–322. b) M. Gimferrer et al., *Inorg. Chem.* **2020**, 59, 15410-15420. c) M. Gimferrer et al., *J. Chem. Theor. Comput.* **2022**, 18, 309-322.
20. a) P. Salvador, E. Ramos-Cordoba, M. Gimferrer, M. Montilla, APOST-3D Program; Universitat de Girona: Girona, Spain, **2020**. b) P. Salvador, E. Ramos-Cordoba, M. Montilla, L. Pujal, M. Gimferrer, *J. Chem. Phys.*, **2024**, 160, 172502. DOI: 10.1063/5.0206187.
21. P. Salvador, E. Ramos-Cordoba, *J. Chem. Phys.* **2013**, 139, 071103.
22. F. Wang, N. Zhu, P. Chen, J. Ye, G. Liu, *Angew. Chem. Int. Ed.* **2015**, 54, 9356.
23. W. Dmowski and M. Kaminski, *J. Fluor. Chem.* **1983**, 23, 207.
24. G. Pawelke, *J. Fluor. Chem.* **1991**, 52, 229.

25. A. M. Romine, N. Nebra, A. I. Konovalov, E. Martin, J. Benet-Buchholz, V. Grushin, *Angew. Chem. Int. Ed.* **2015**, *54*, 2745–2749.
26. H. Liu, Q. Shen, *Org. Chem. Front.* **2019**, *6*, 2324.

## Copies of NMR spectra

**Bis( $\mu_2$ -chlorido)-diaqua-tetrakis(trifluoromethyl)copper(III) 3**

$^{19}\text{F}$  NMR ( $\text{CD}_3\text{CN}$ , 376 MHz, 293 K)

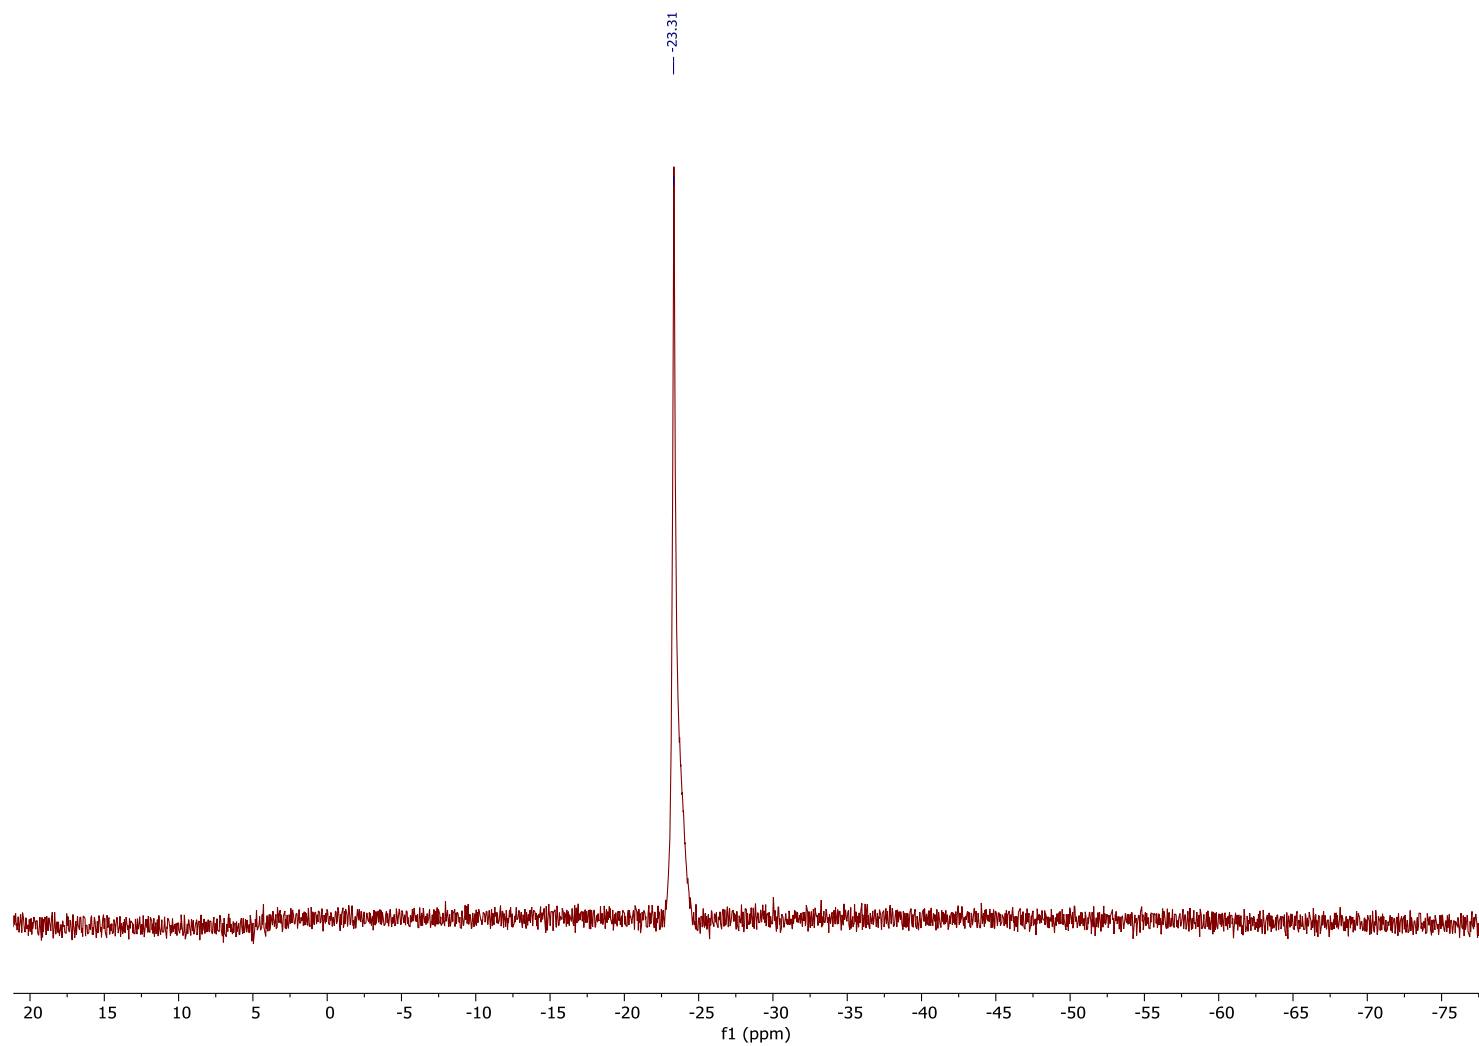

$^{19}\text{F}$  NMR ( $\text{CD}_2\text{Cl}_2$ , 376 MHz, 213 K)

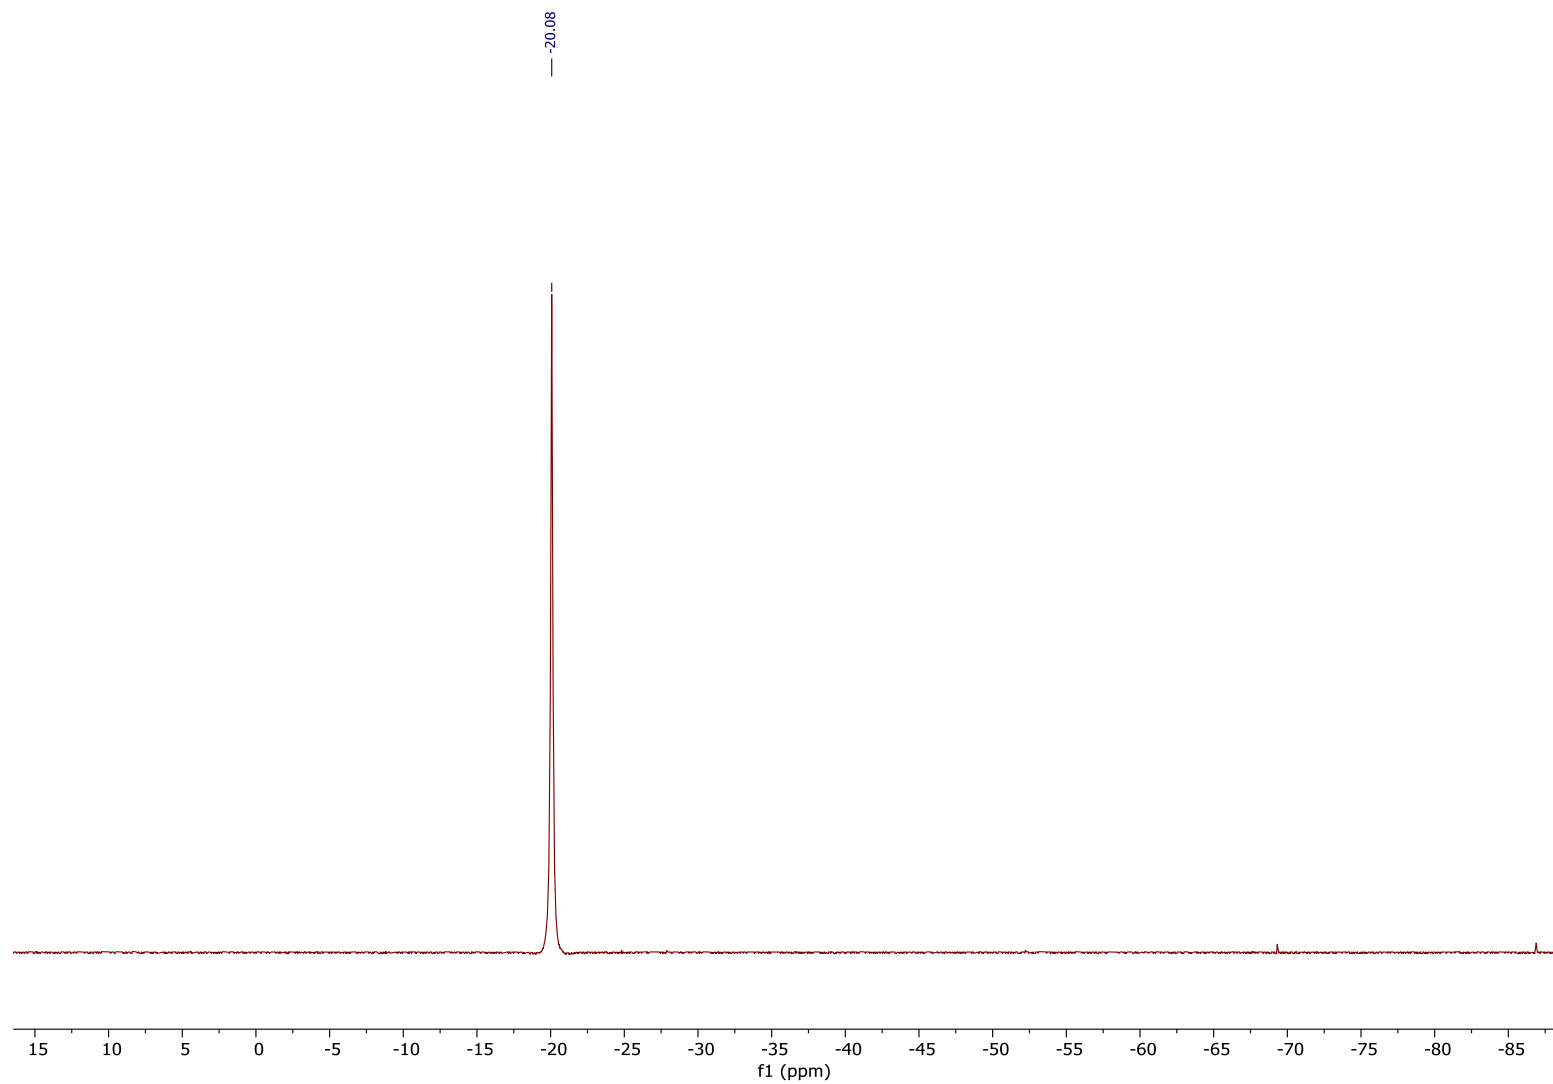

$^{13}\text{C}\{^{19}\text{F}\}$  NMR ( $\text{CD}_2\text{Cl}_2$ , 101 MHz, 213 K) (from the concentrated reaction mixture)

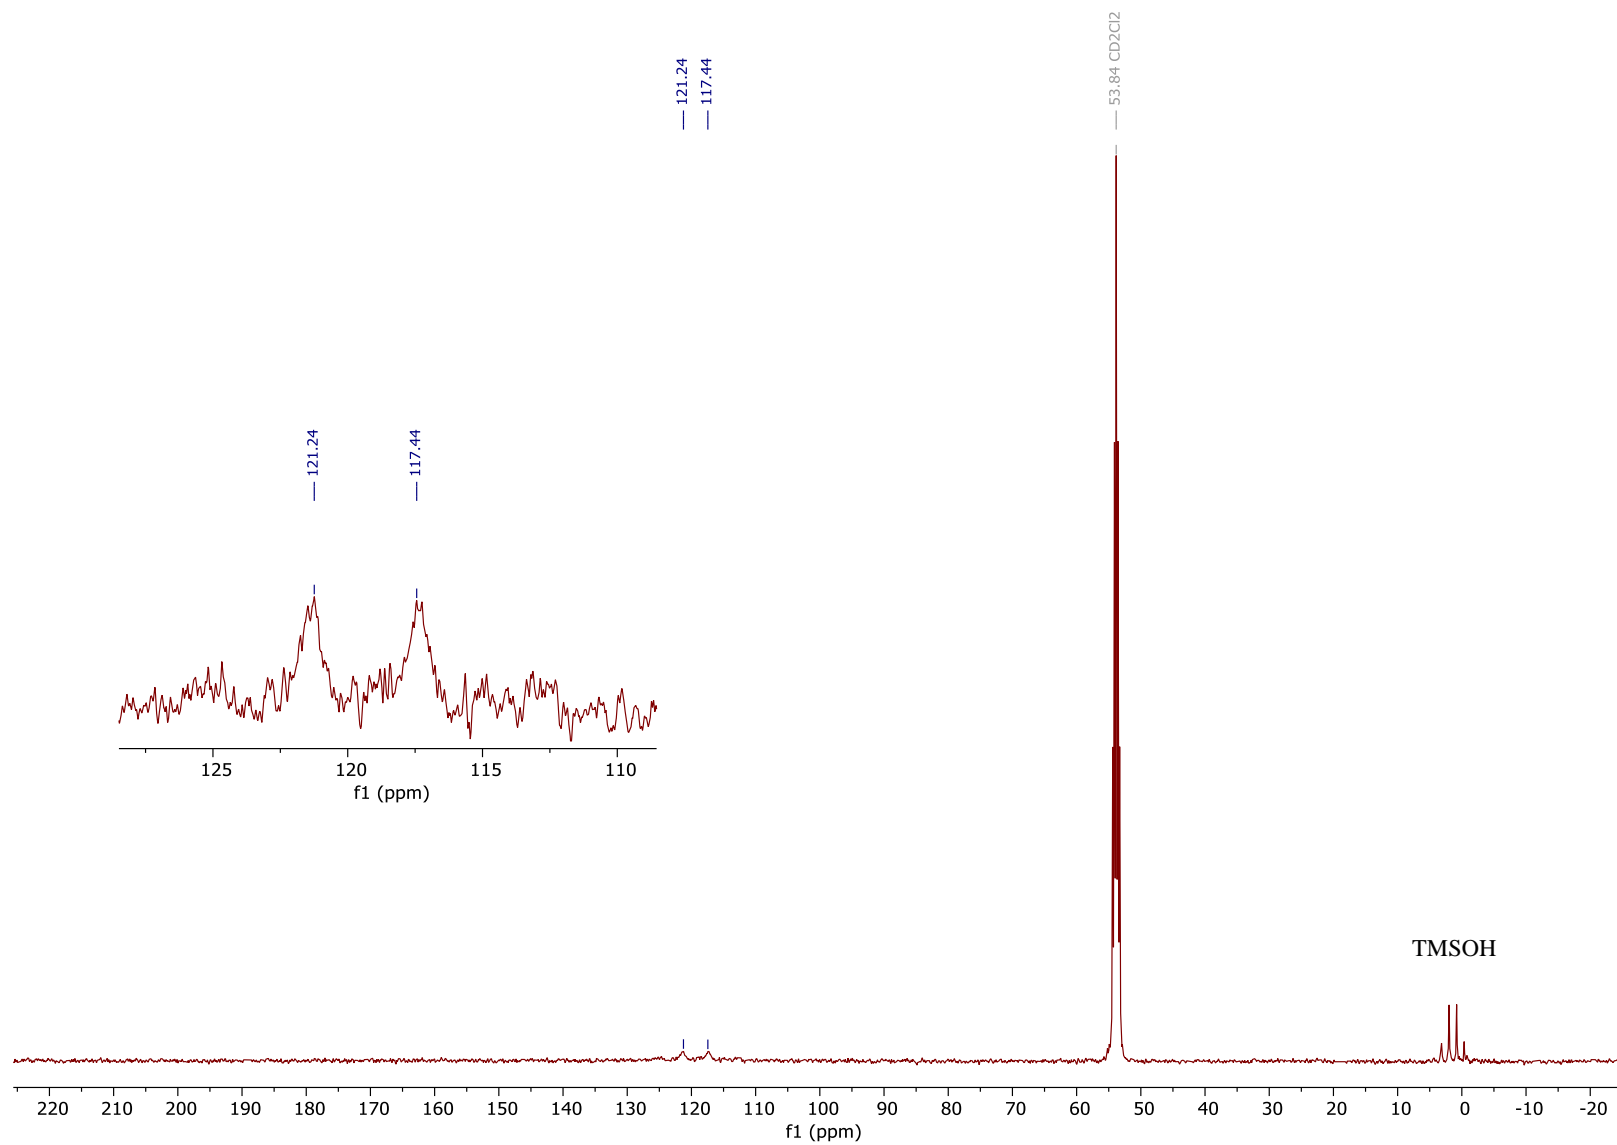

**Bis( $\mu_2$ -( $\kappa_1$ -azido))tetrakis(trifluoromethyl)dicopper(III) 4**

$^{19}\text{F}$  NMR ( $\text{CDCl}_3$ , 376 MHz)

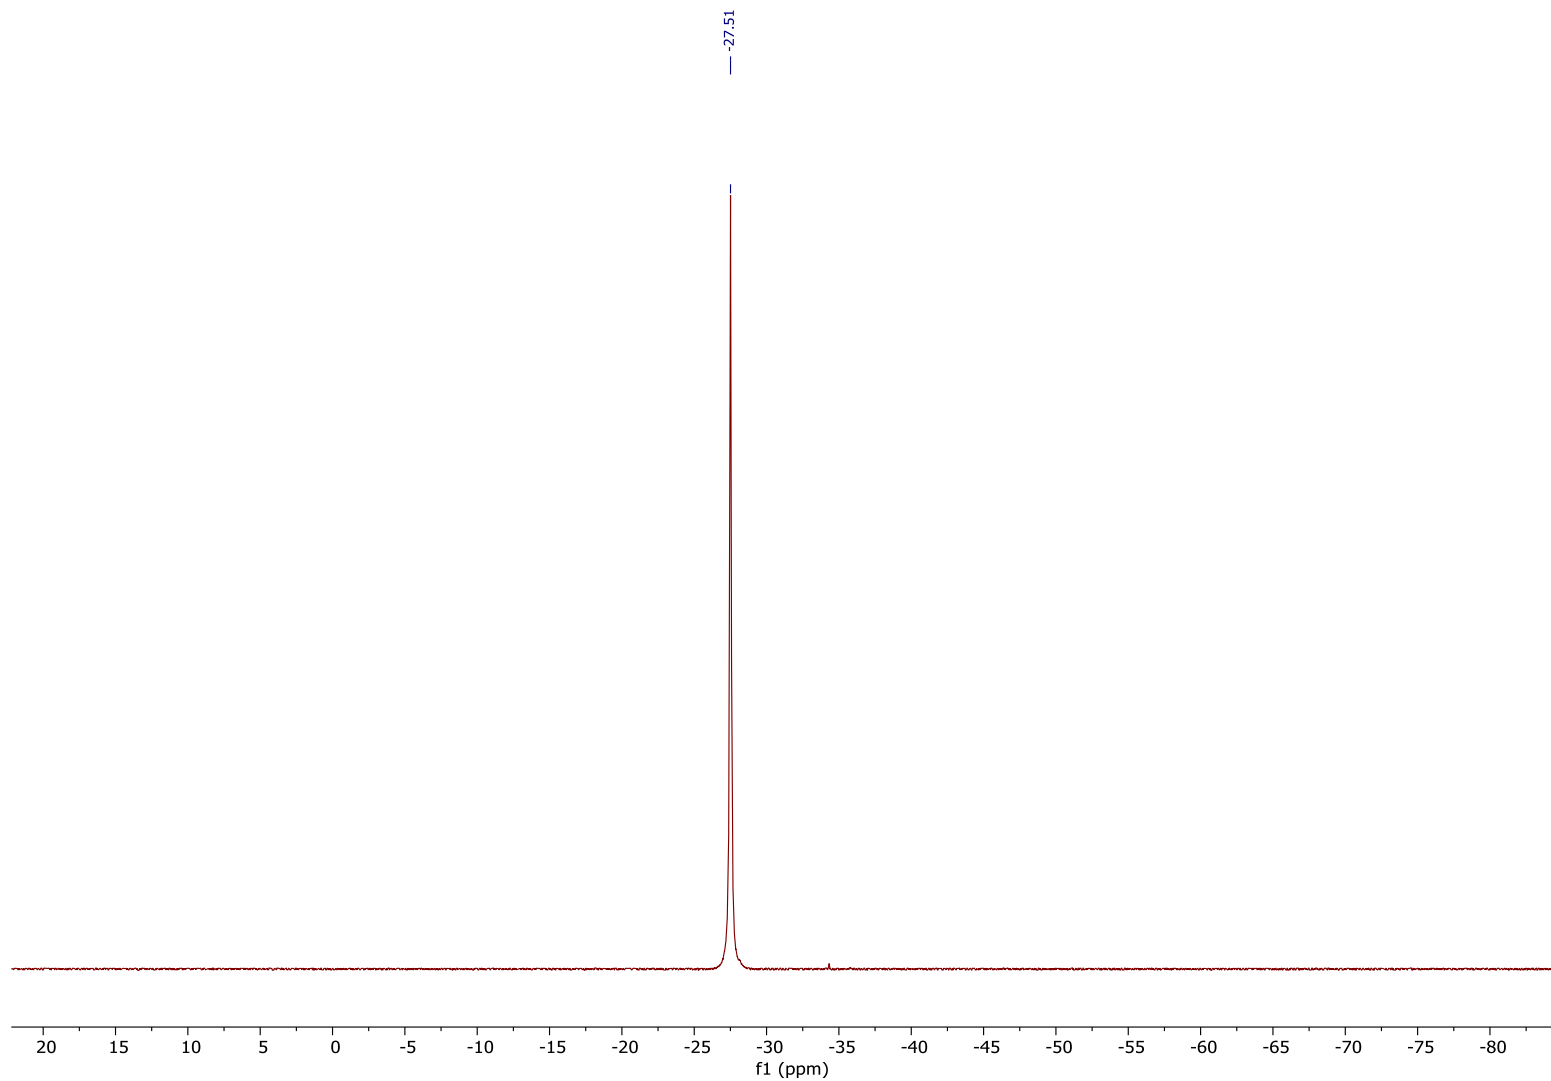

$^{13}\text{C}\{^{19}\text{F}\}$  NMR ( $\text{CDCl}_3$ , 101 MHz)

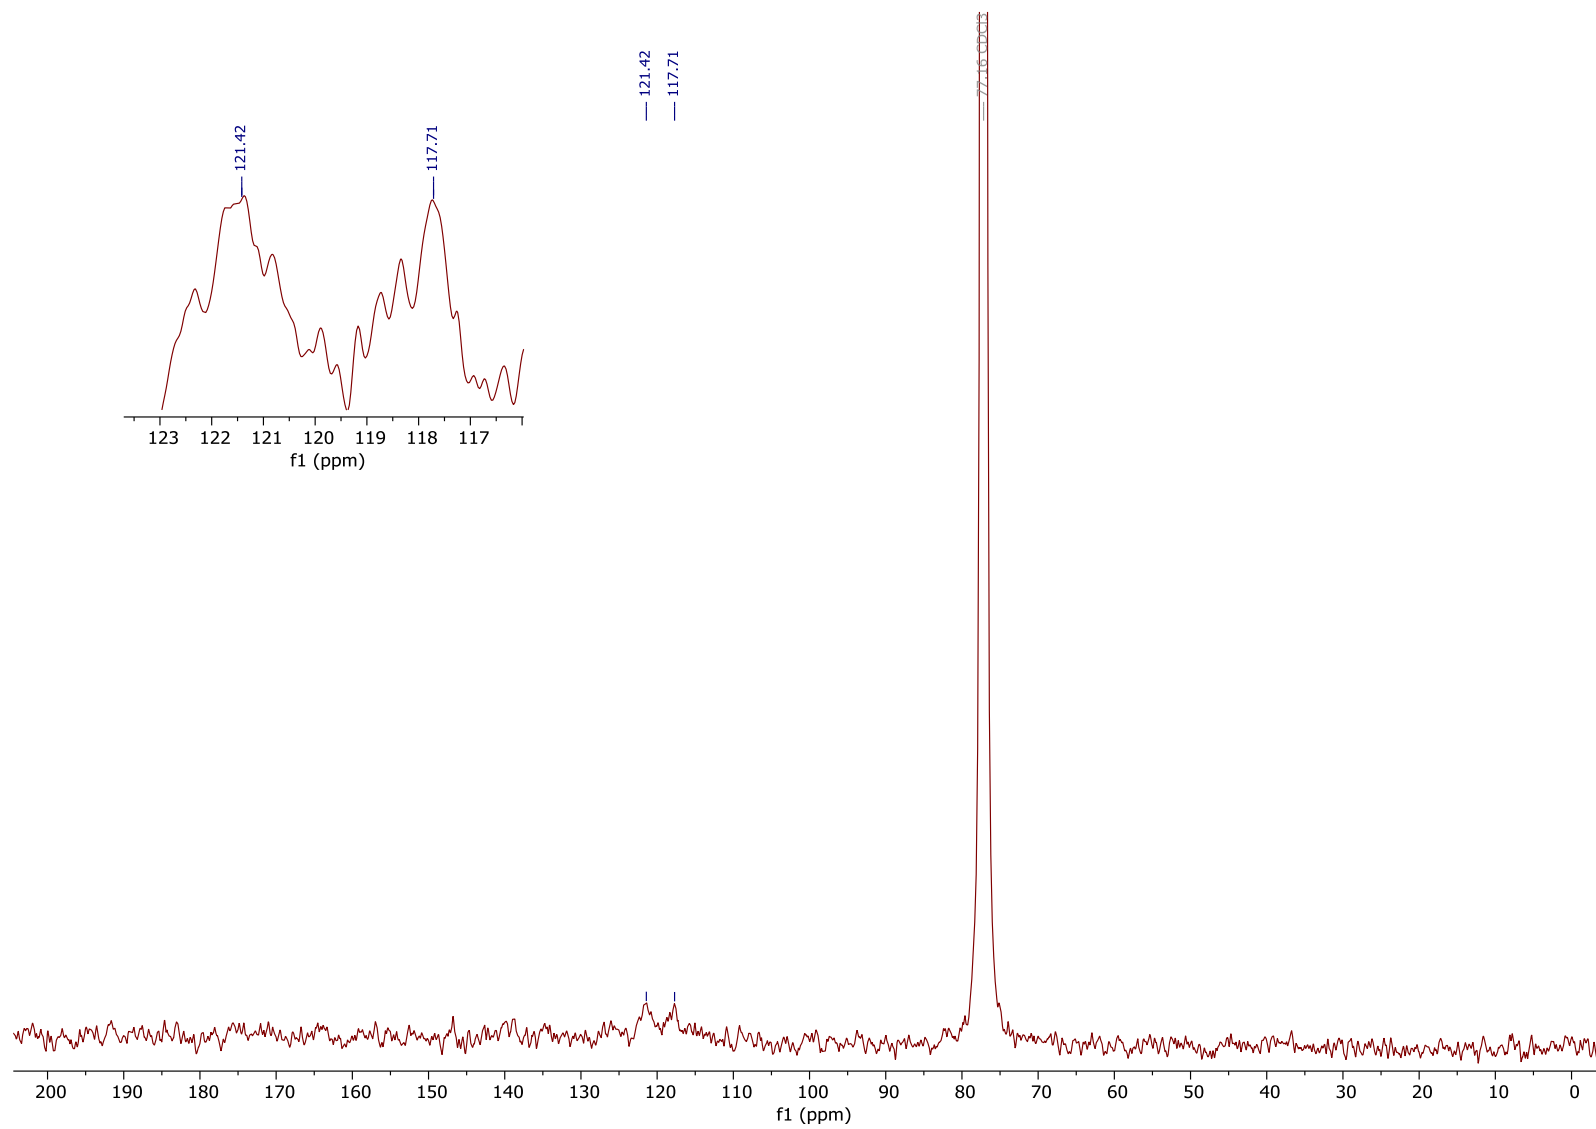

**$\mu_2$ -(Dimethylamino)- $\mu_2$ -hydroxy-tetrakis(trifluoromethyl)dicopper(III) 5**

$^{19}\text{F}$  NMR ( $\text{CD}_2\text{Cl}_2$ , 376 MHz, 213 K)

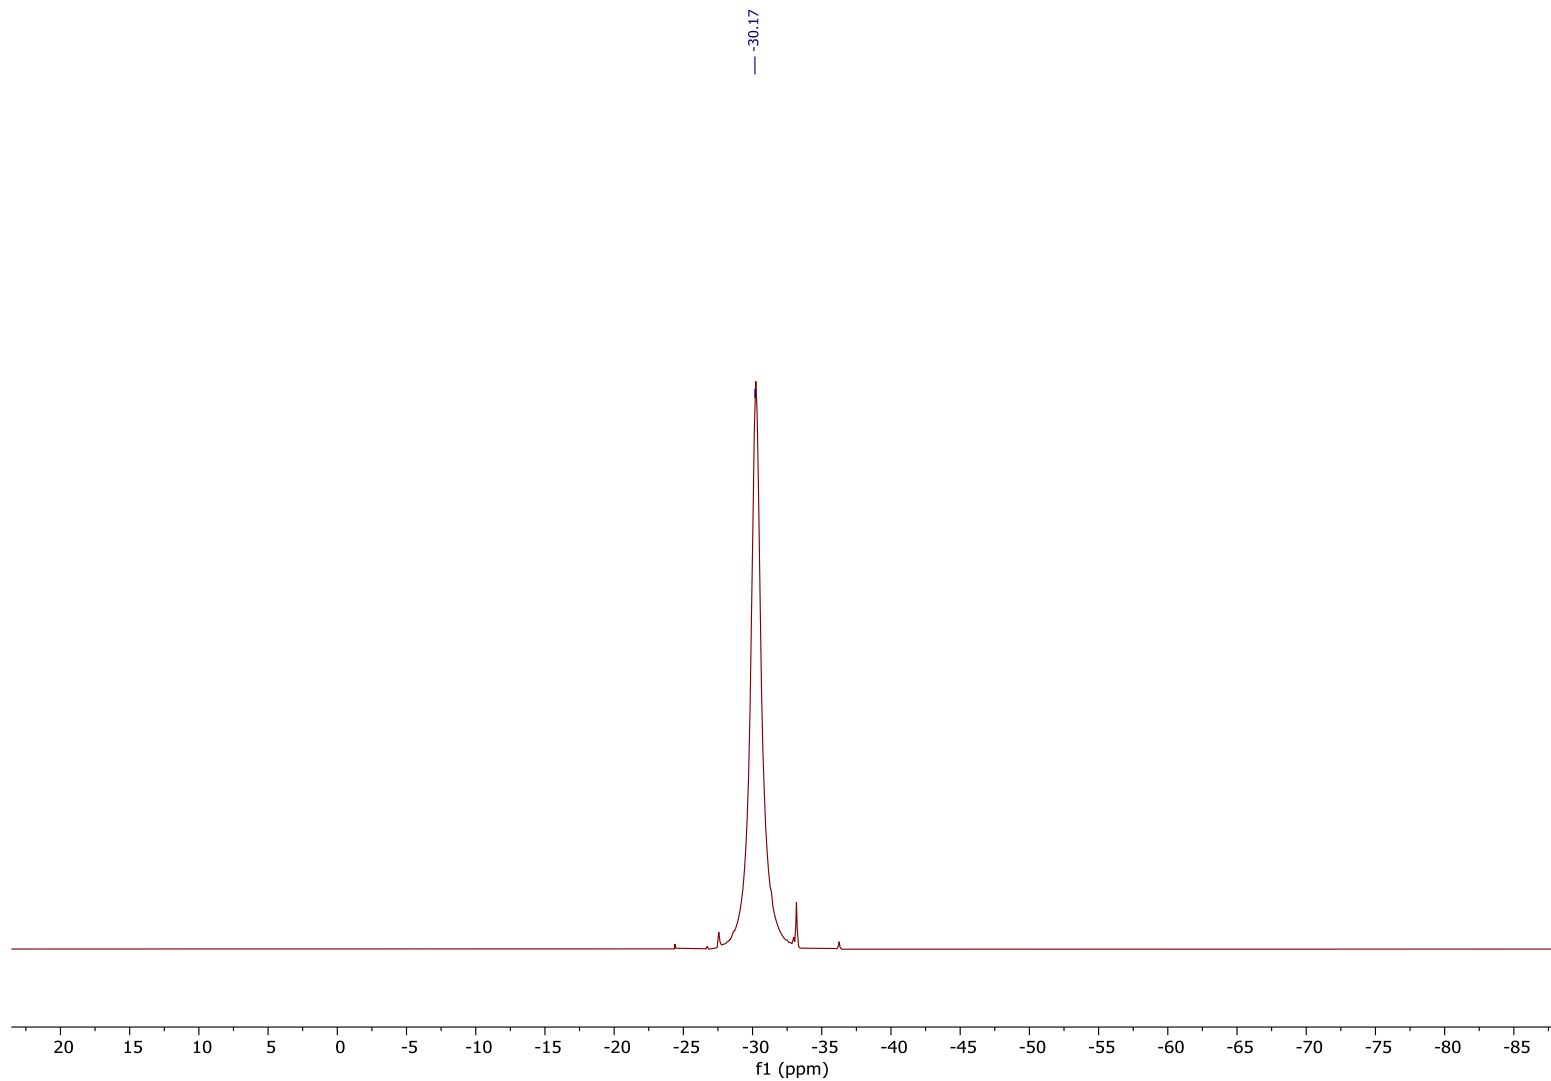

$^1\text{H}$  NMR ( $\text{CD}_2\text{Cl}_2$ , 400 MHz, 213 K)

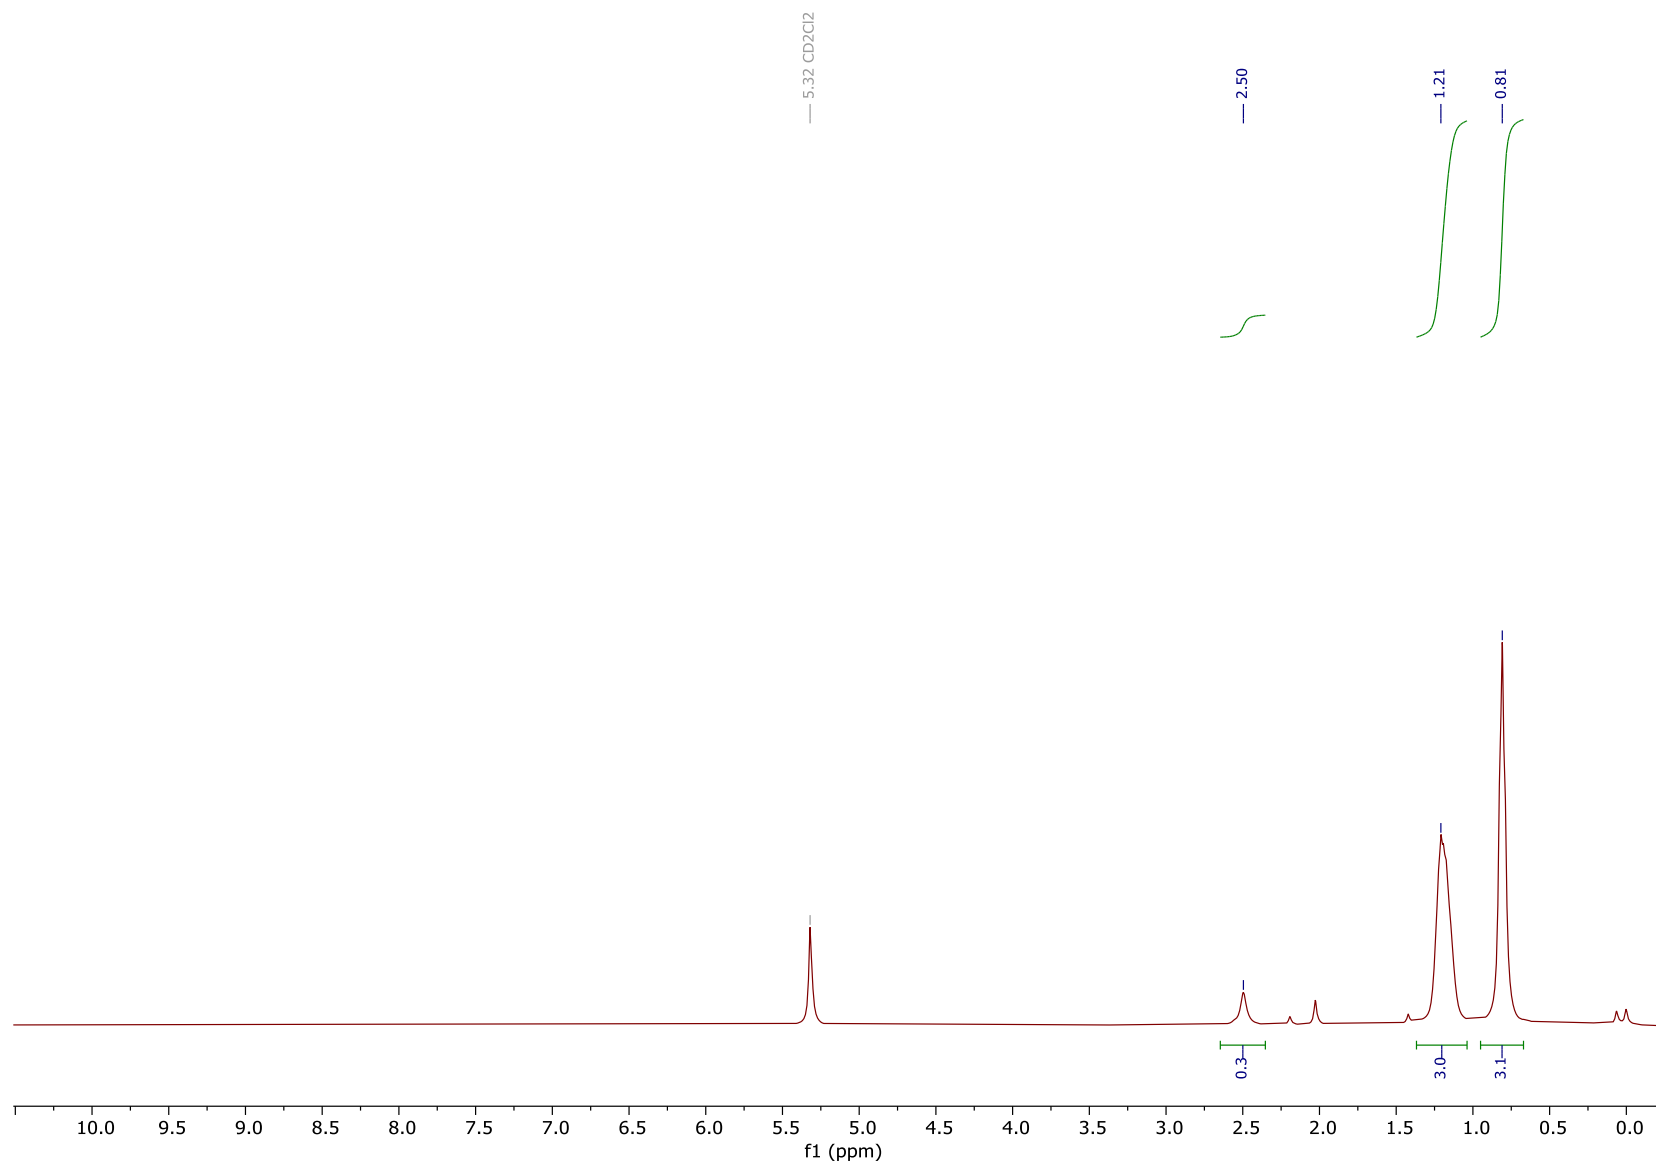

**(E)-1-(1-azido-3,3,3-trifluoroprop-1-en-1-yl)-4-chlorobenzene 7a (major isomer)**

<sup>1</sup>H NMR (CDCl<sub>3</sub>, 400 MHz, 293 K)

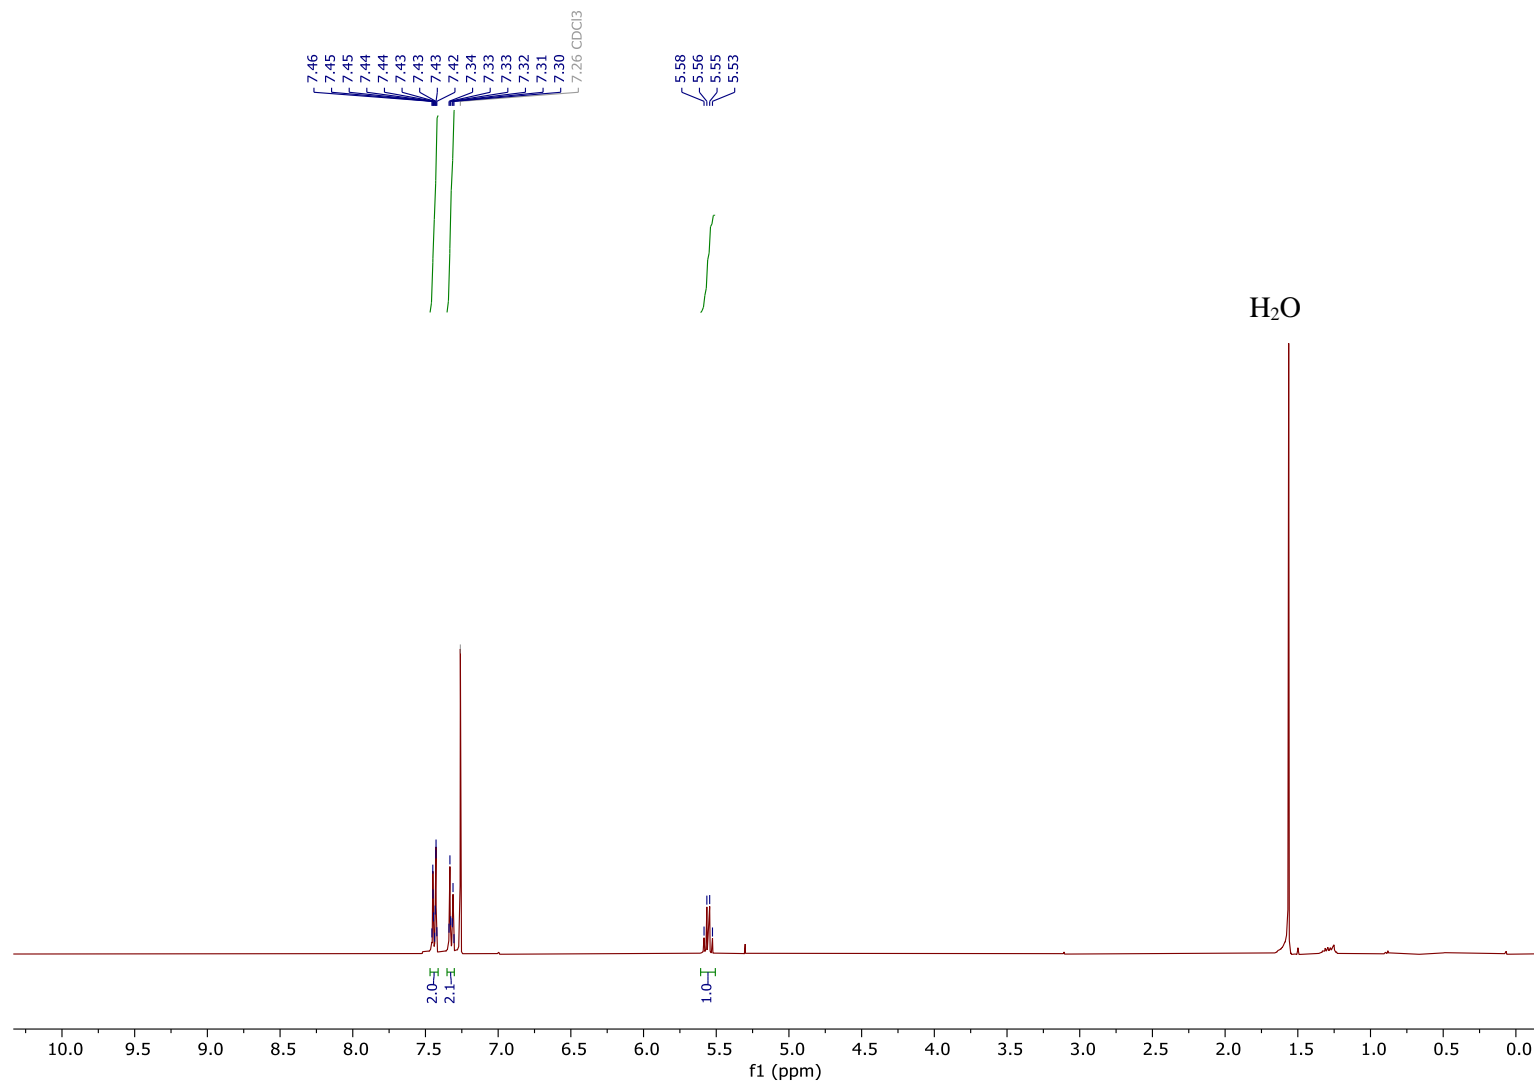

$^{13}\text{C}$  NMR ( $\text{CDCl}_3$ , 101 MHz, 293 K)

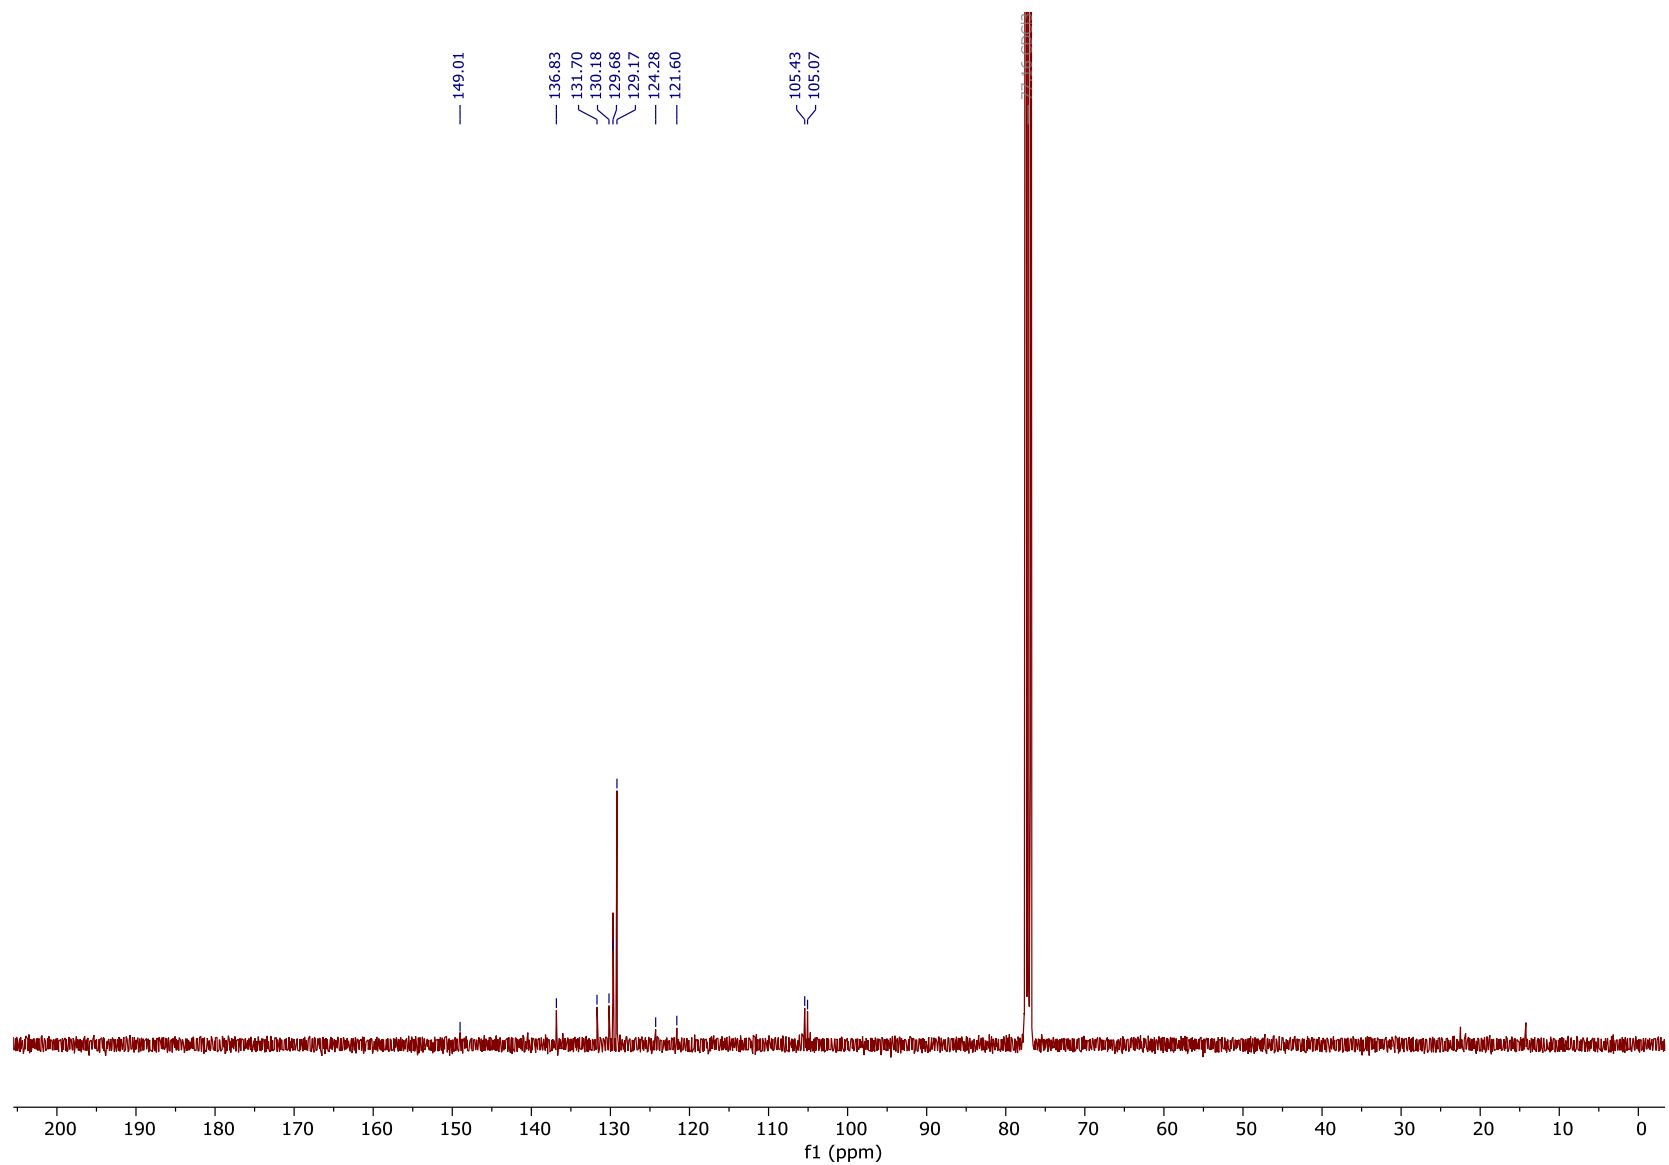

$^{19}\text{F}$  NMR ( $\text{CDCl}_3$ , 376 MHz, 293 K)

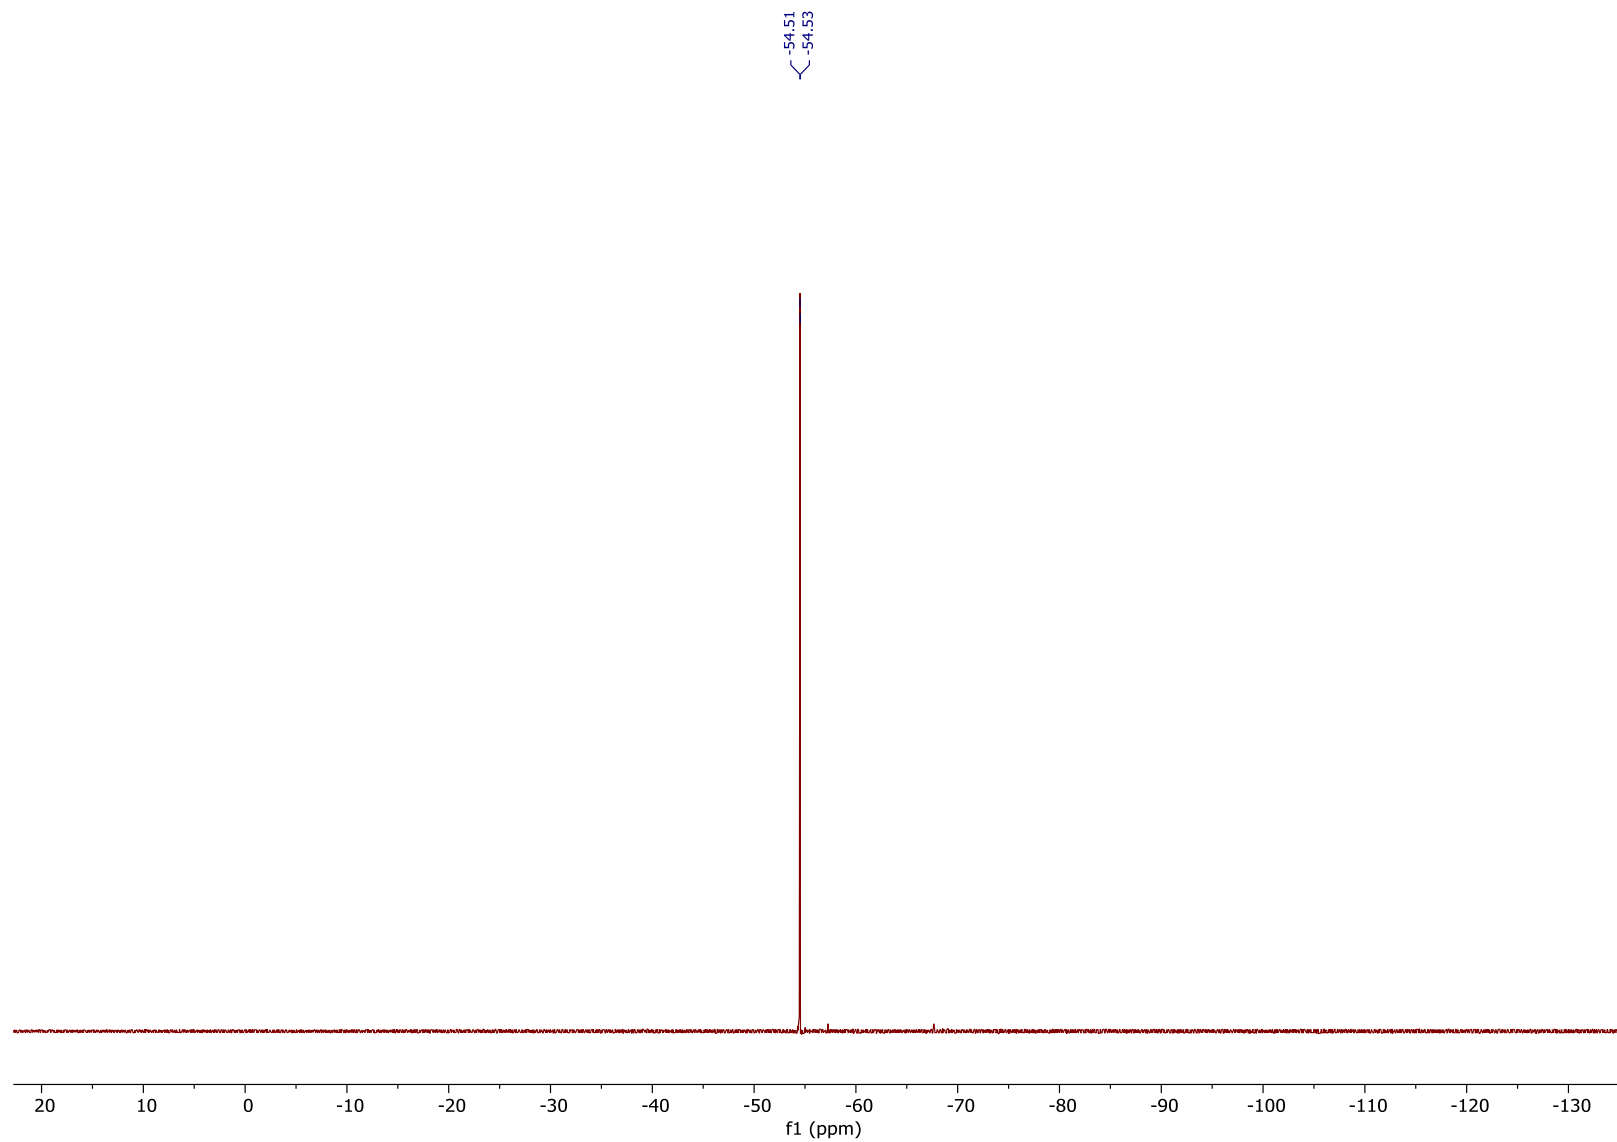

**(Z)-1-(1-azido-3,3,3-trifluoroprop-1-en-1-yl)-4-chlorobenzene 7b (minor isomer with traces of major (E)-isomer)**

<sup>1</sup>H NMR (CDCl<sub>3</sub>, 400 MHz, 293 K)

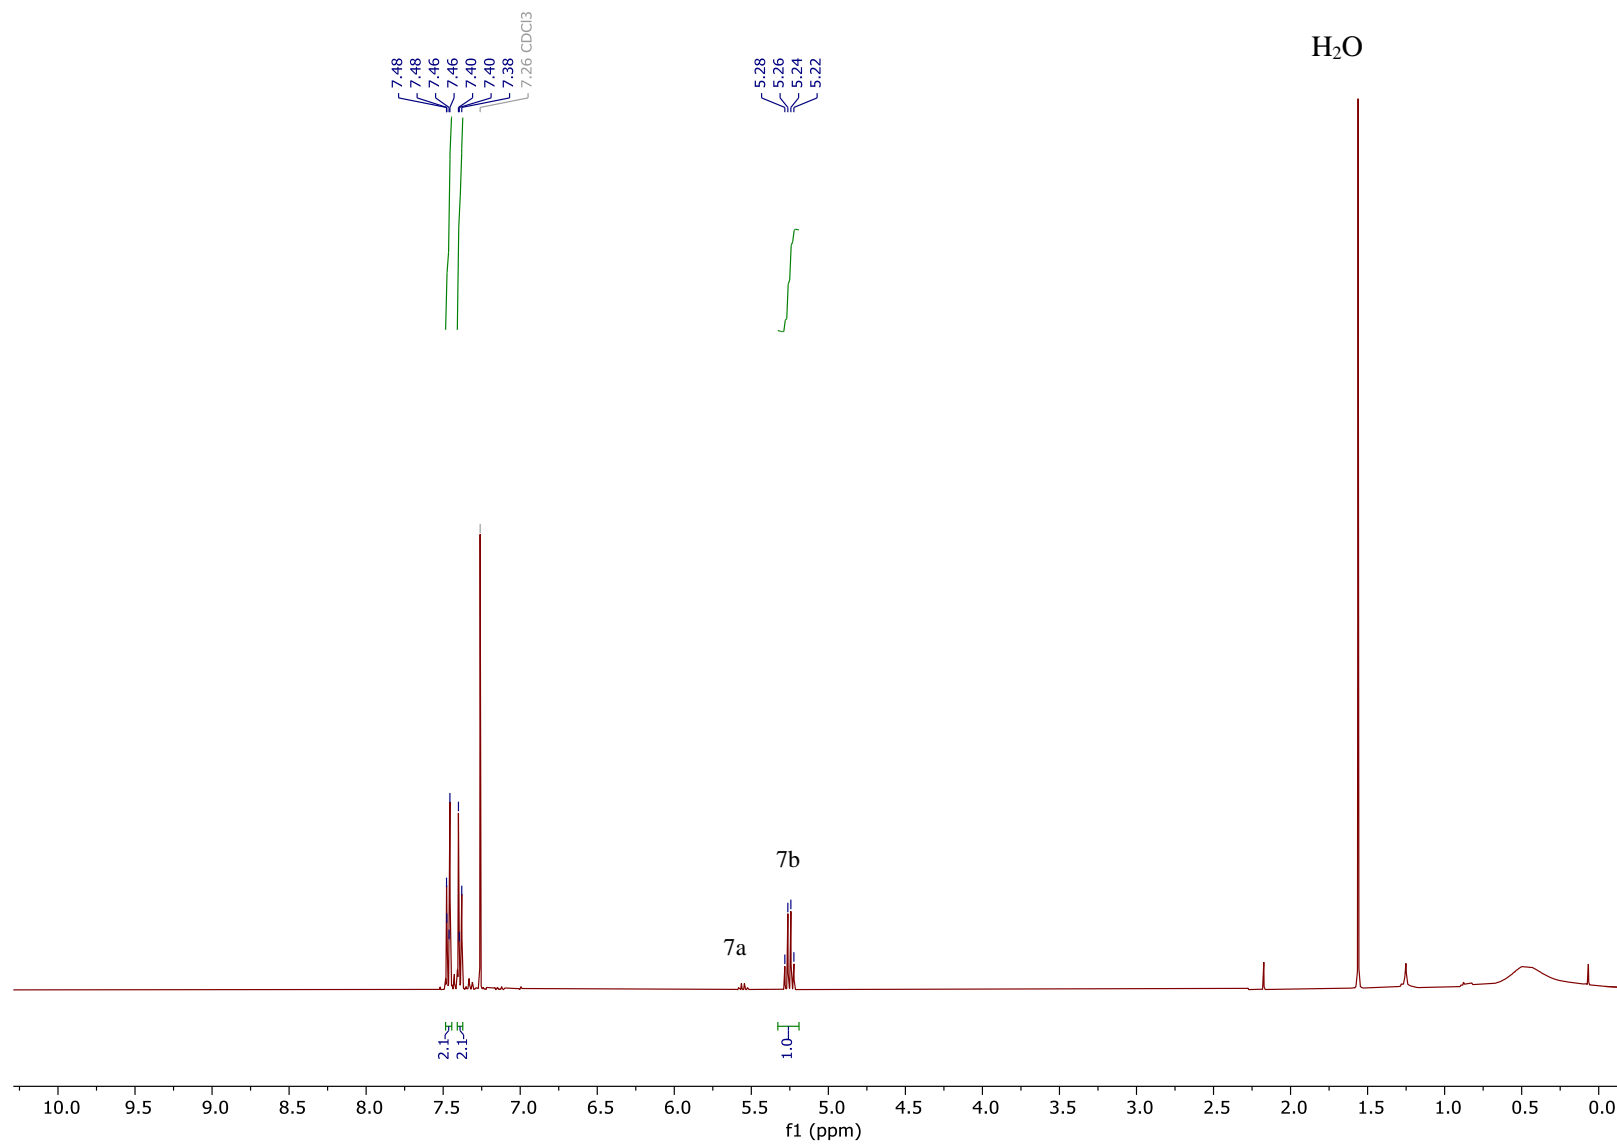

$^{13}\text{C}$  NMR ( $\text{CDCl}_3$ , 101 MHz, 293 K)

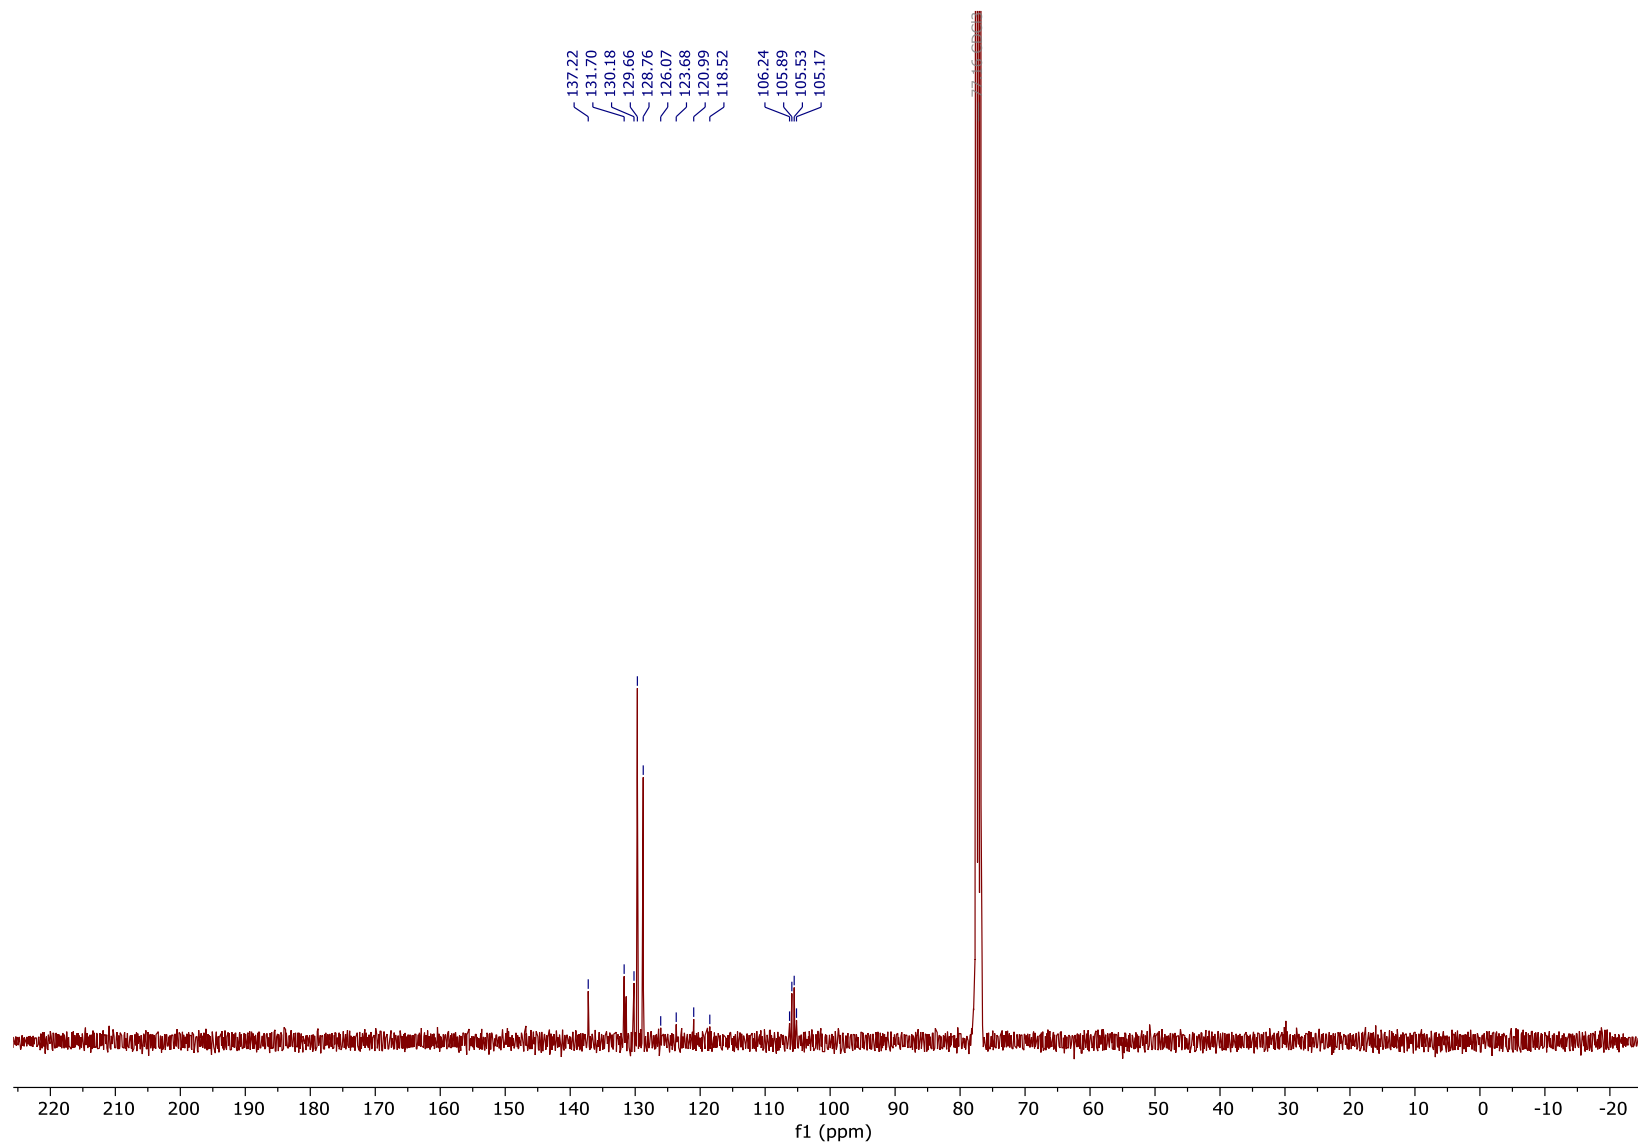

$^{19}\text{F}$  NMR ( $\text{CDCl}_3$ , 400 MHz, 293 K)

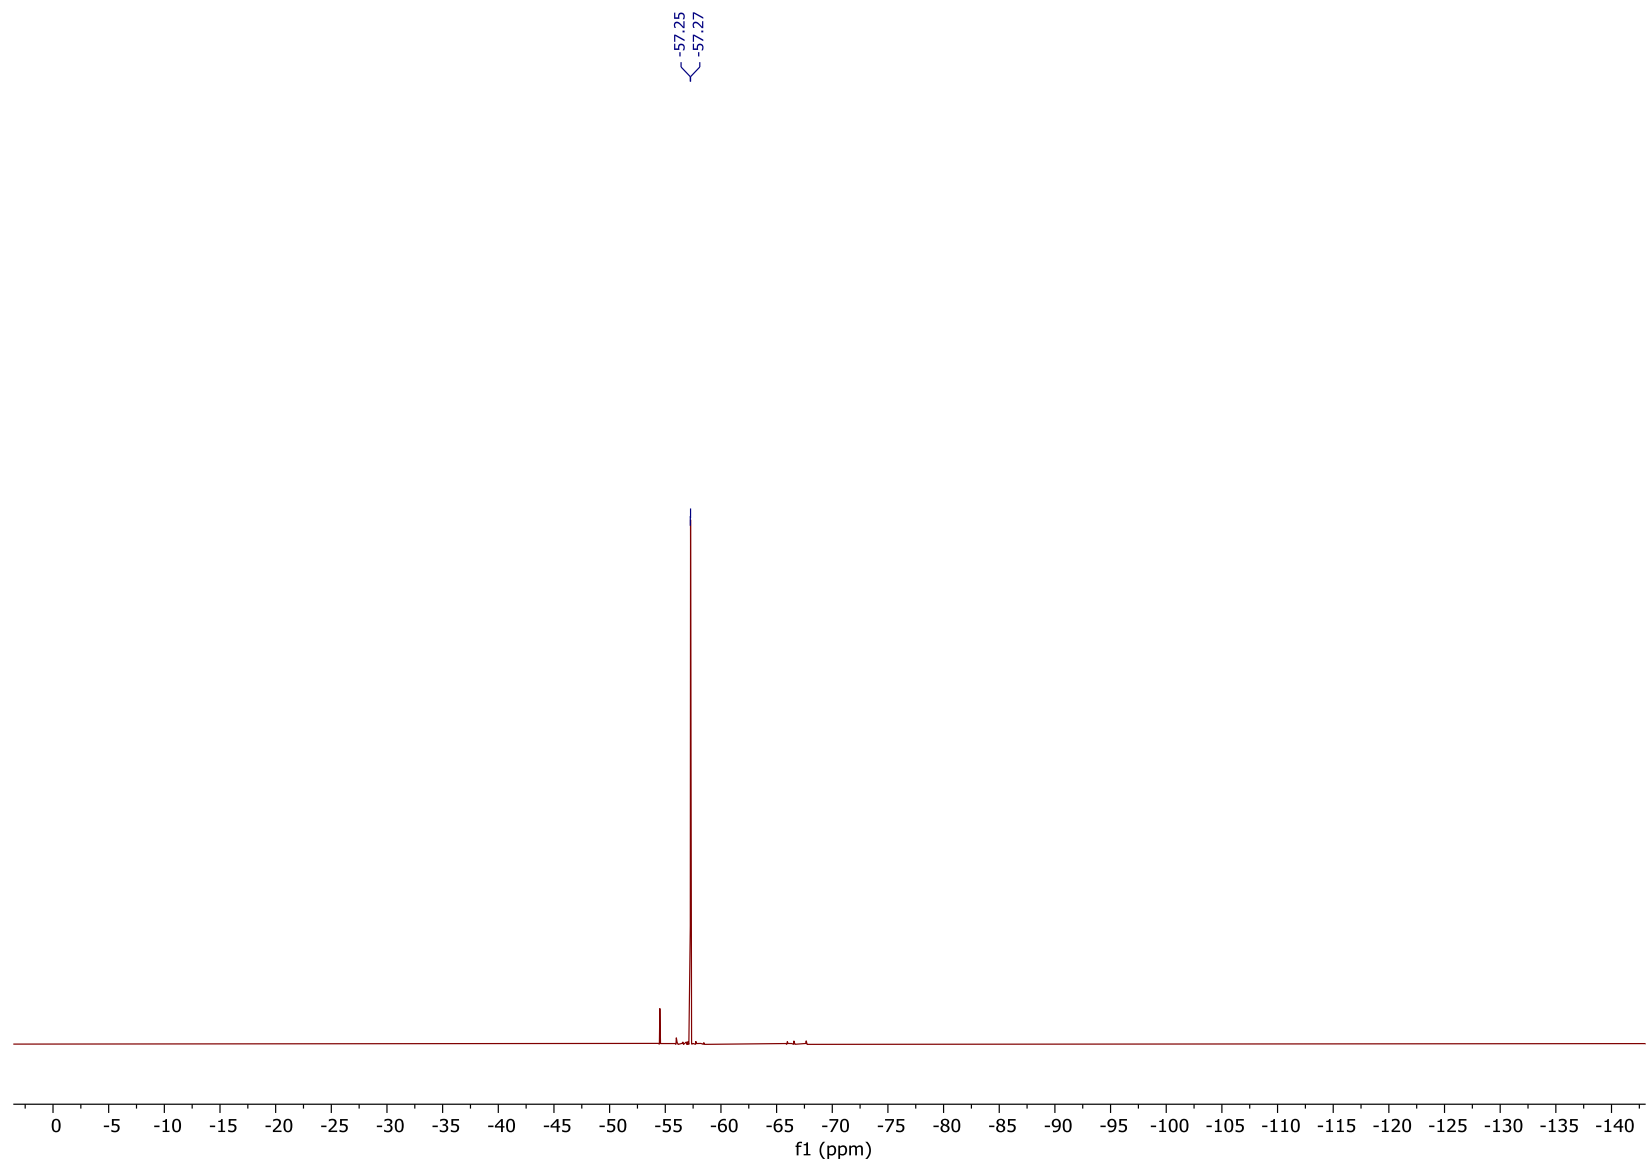

$^1\text{H}$ - $^1\text{H}$  NOESY NMR ( $\text{CDCl}_3$ , 400 MHz, 293 K)

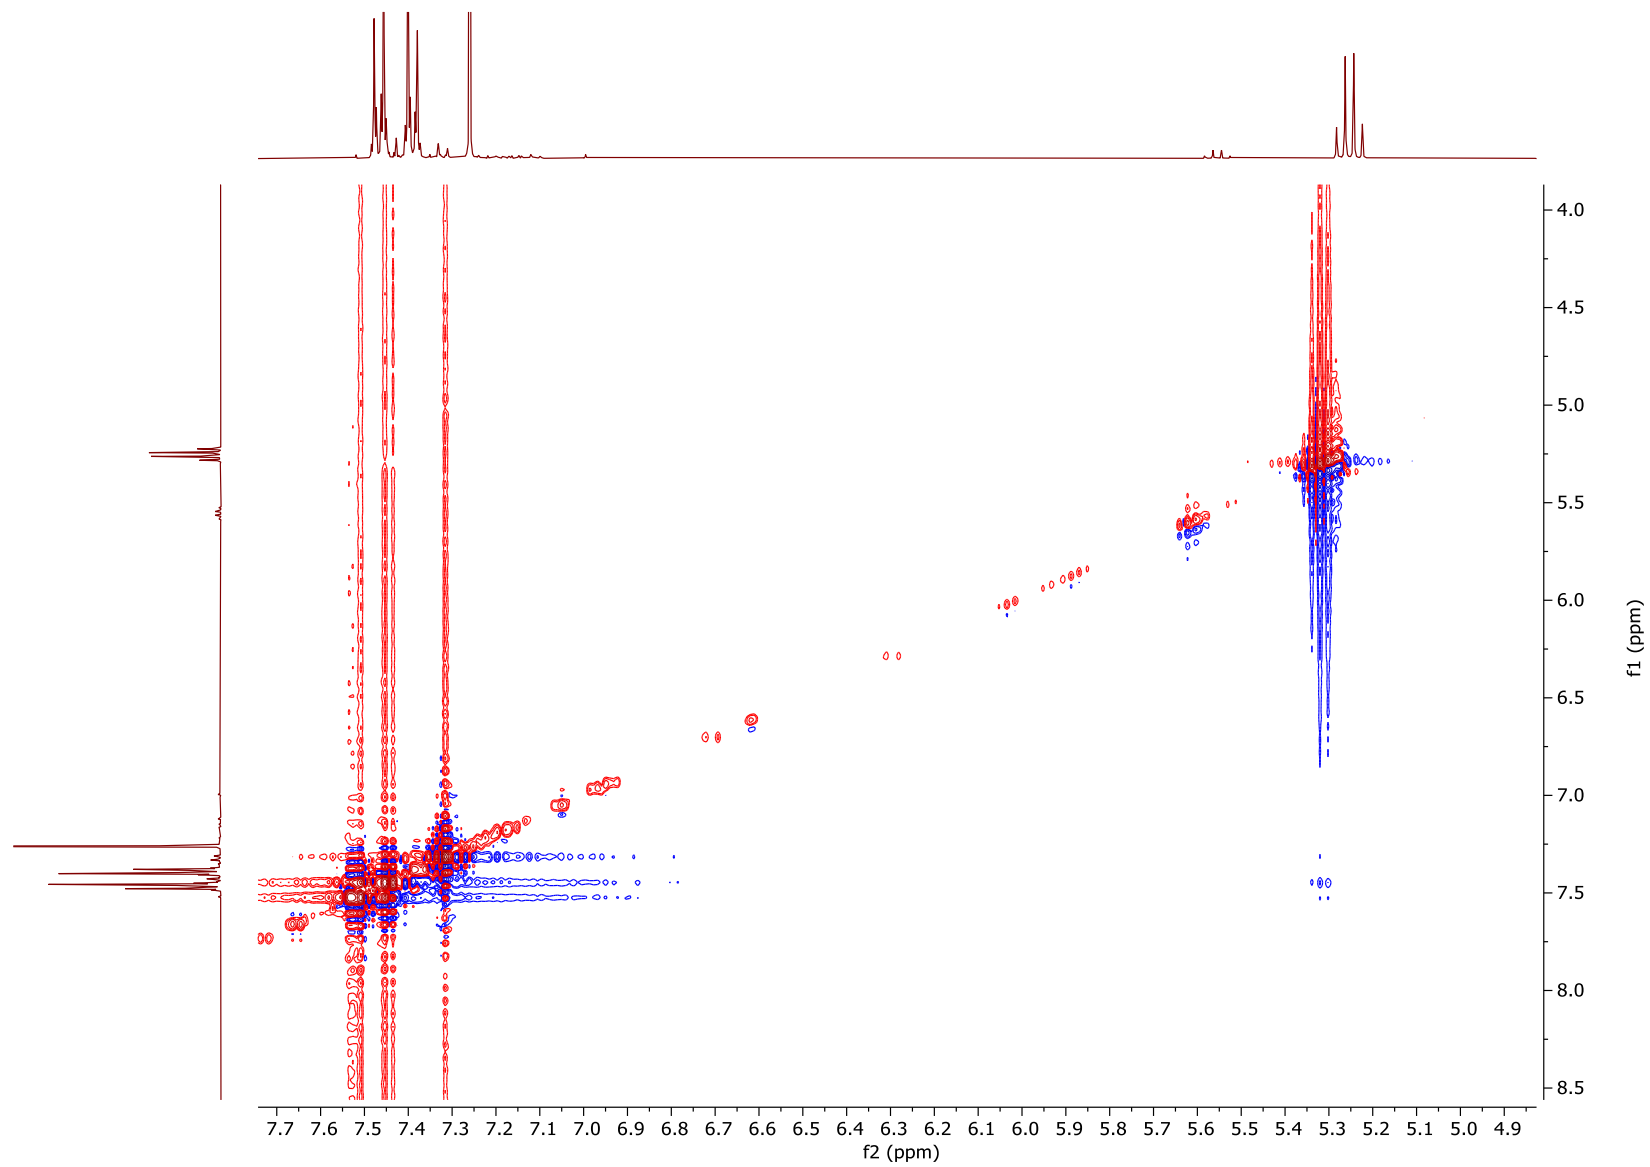

$^1\text{H}$ ,  $^{19}\text{F}$ -HETCOR NMR ( $\text{CDCl}_3$ , 293 K)

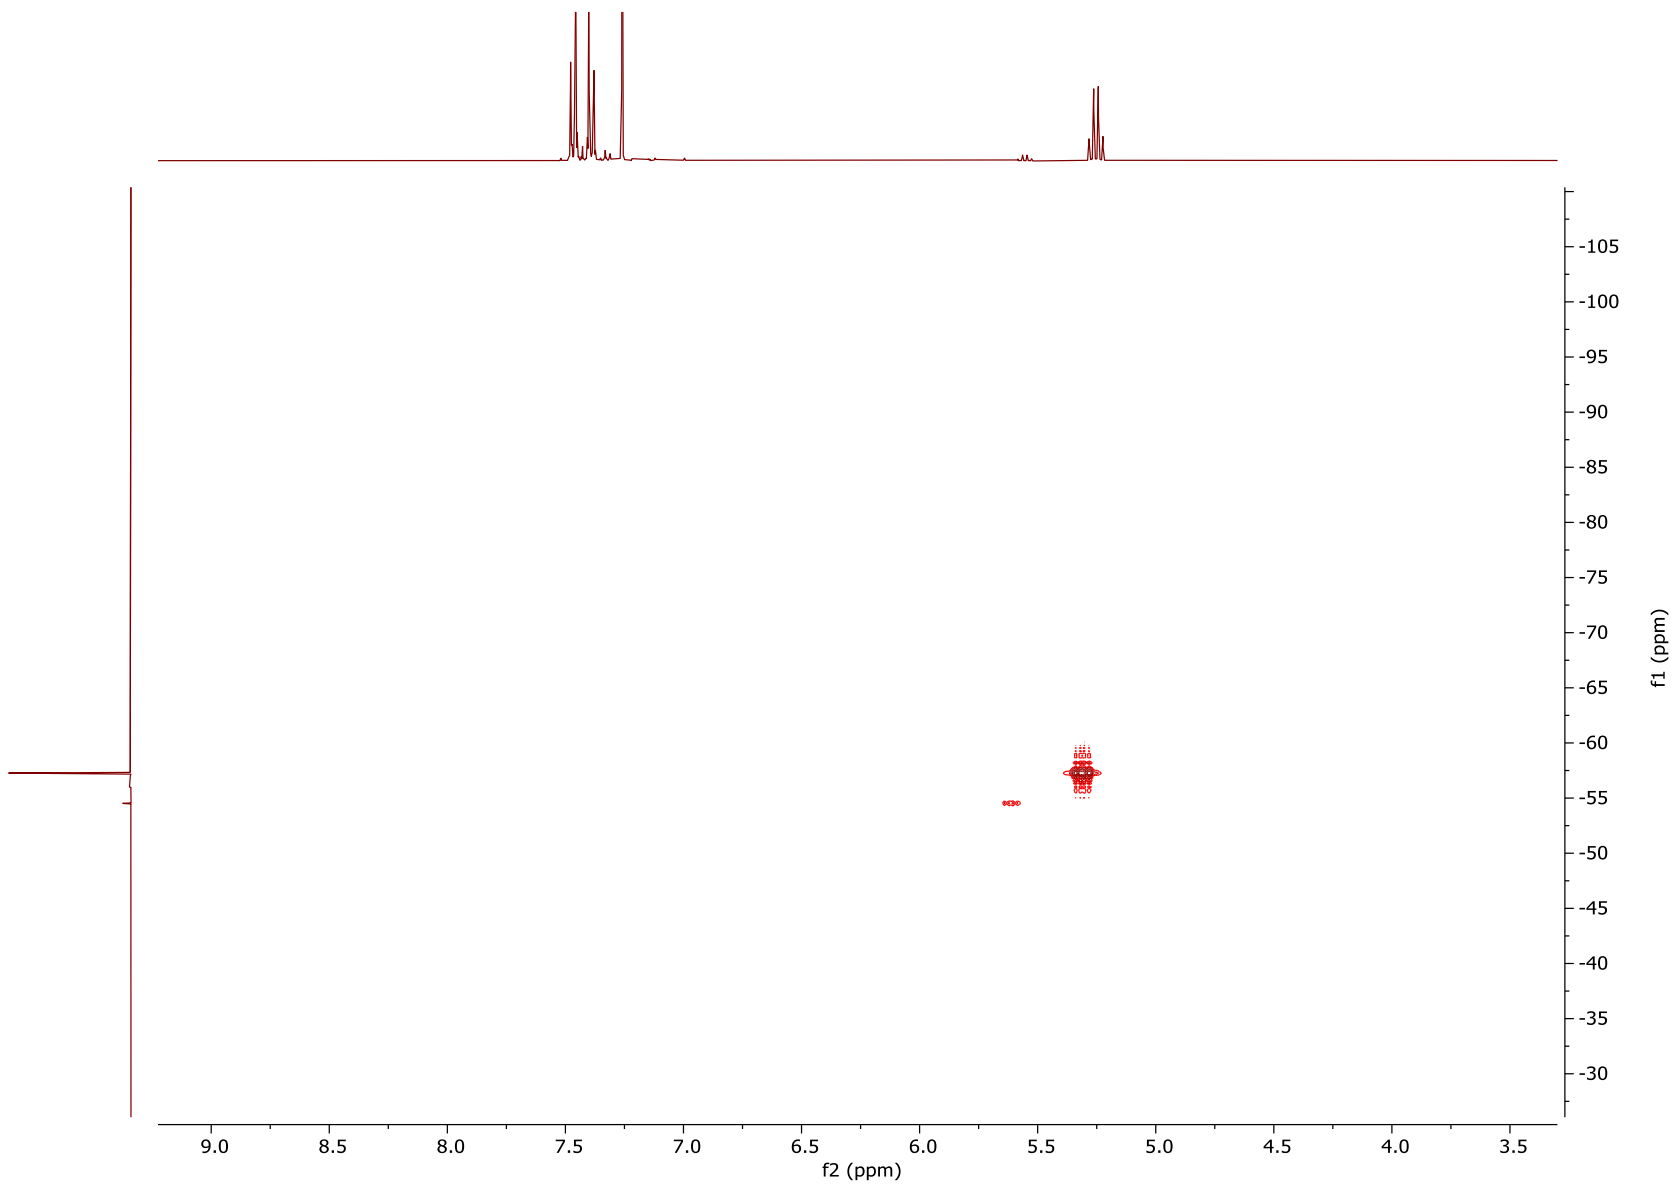

### Detection of TEMPO-CF<sub>3</sub> adduct

<sup>19</sup>F NMR (CDCl<sub>3</sub>, 376 MHz) [+ 1 equiv. C<sub>6</sub>F<sub>6</sub>]

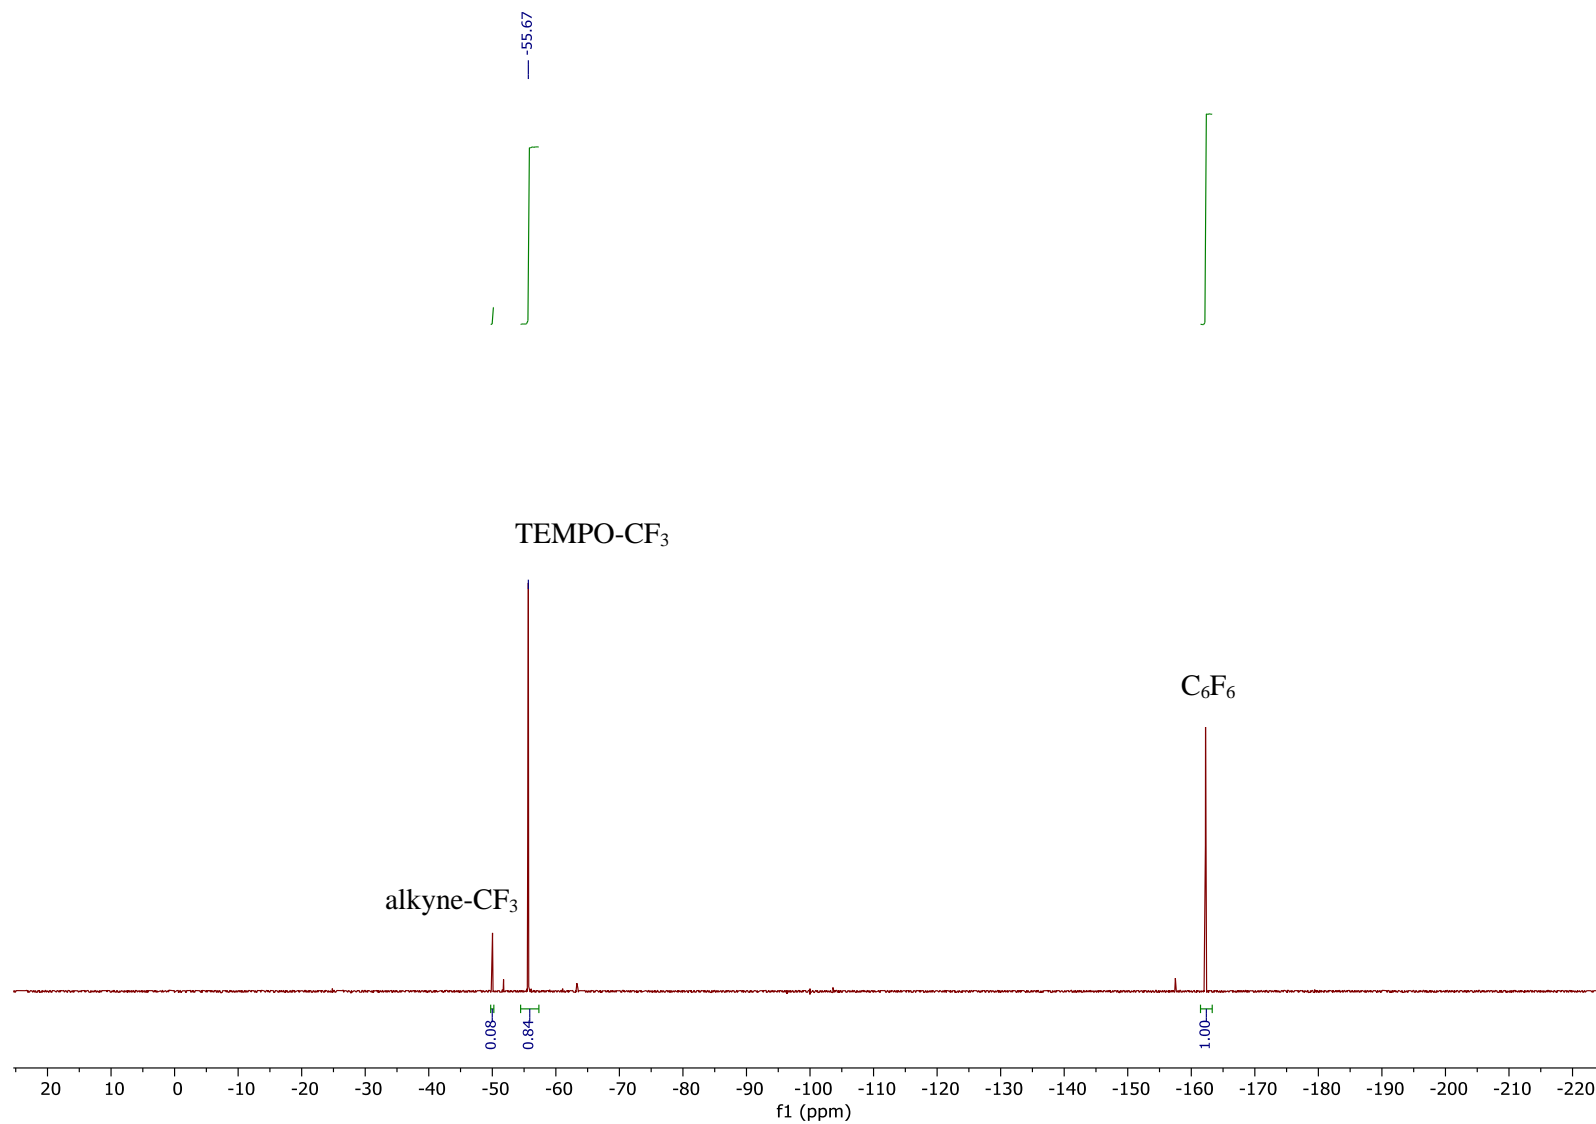

# Detection of O-(difluoromethyl)ethanol **8**

$^{19}\text{F}$  NMR ( $\text{CDCl}_3$ , 376 MHz) [+ 2 equiv.  $\text{C}_6\text{F}_6$ ]

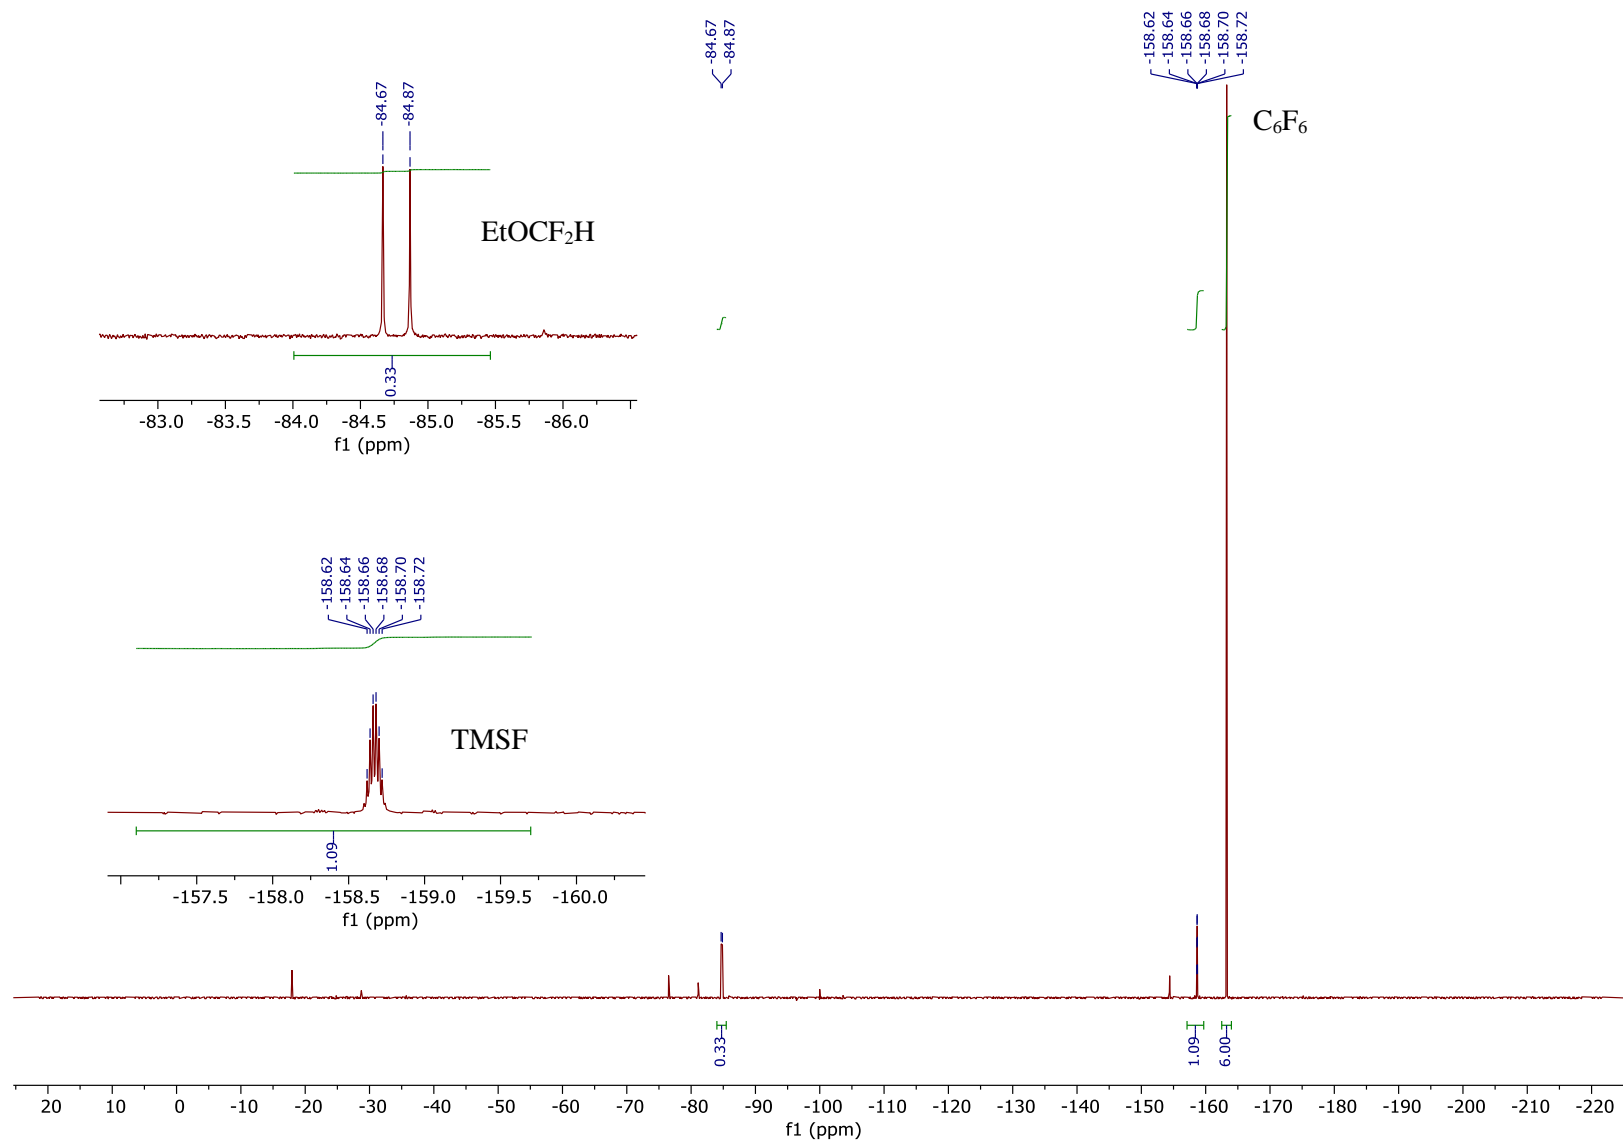

### Detection of Me<sub>2</sub>N-CF<sub>3</sub> (9) via reductive elimination of 5

<sup>19</sup>F NMR (CD<sub>2</sub>Cl<sub>2</sub>, 376 MHz, 293 K), 5 minutes after warming up to room temperature

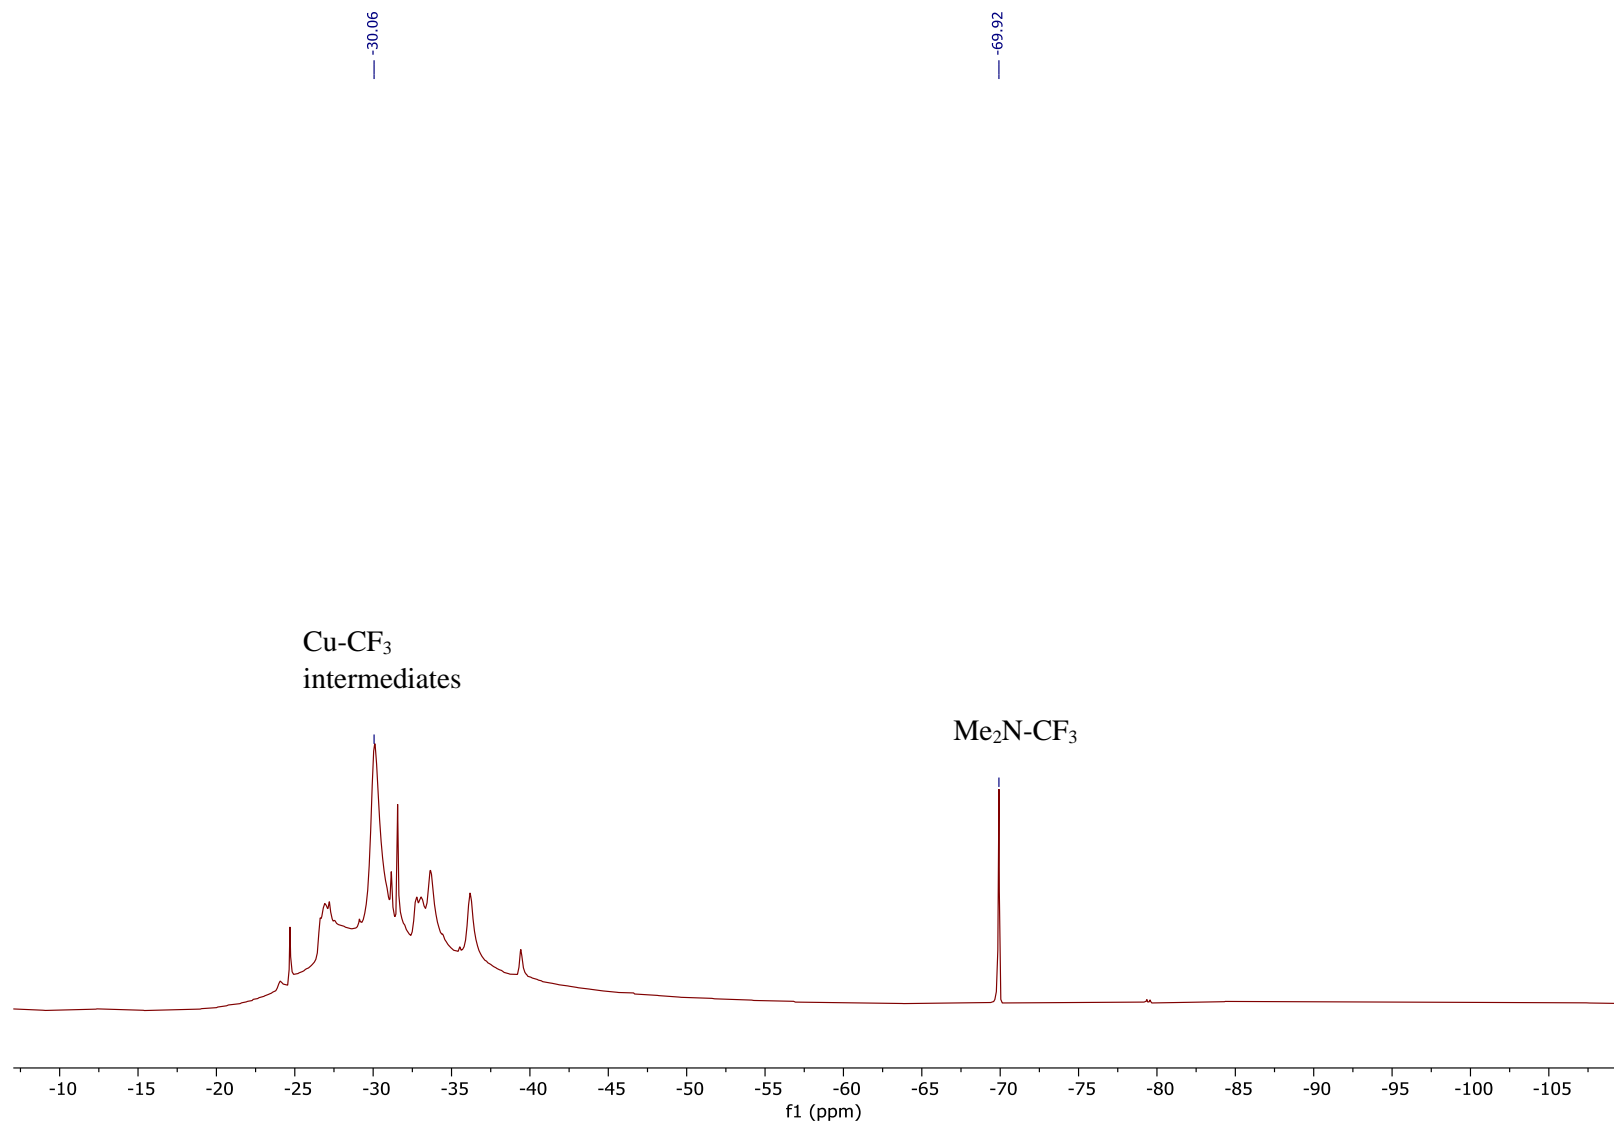

$^{19}\text{F}$  NMR ( $\text{CD}_2\text{Cl}_2$ , 376 MHz, 293 K), 30 minutes after warming up to room temperature

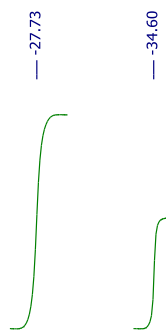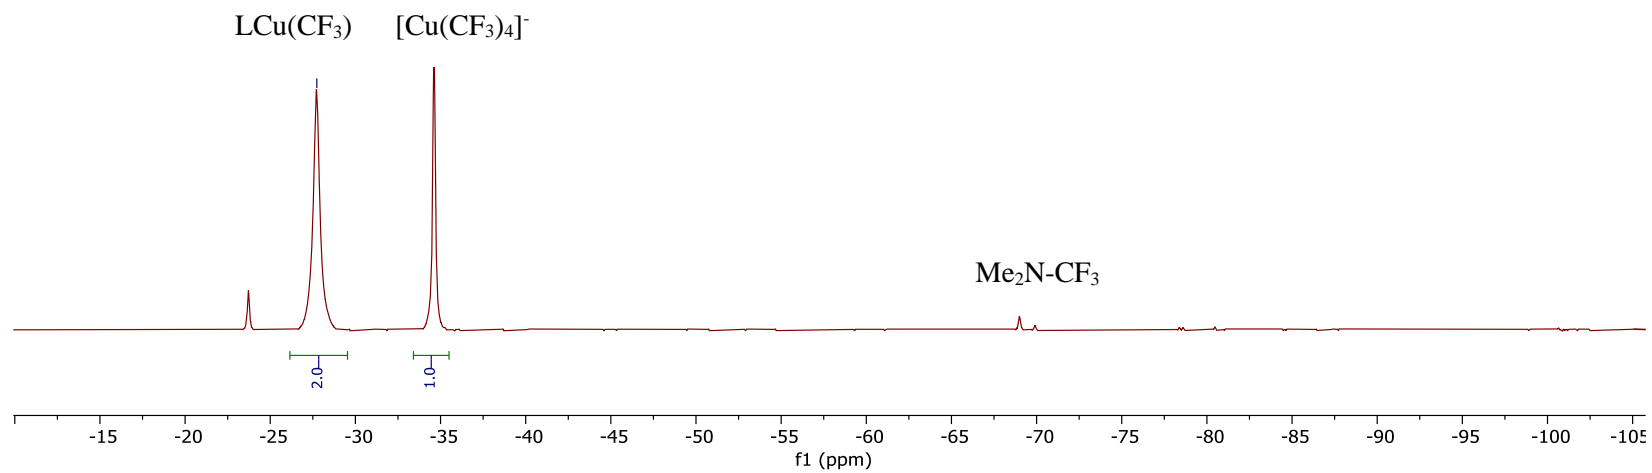

Supplement: d6qi00530f4.pdf [file d6qi00530f4.pdf]
